# Supplementary material for: Asymmetric Michael Addition Organocatalyzed by α,β-Dipeptides under Solvent-Free Reaction Conditions
Source: MDPI journal article supplement (doi:10.3390/molecules22081328), 2017-08-10
Supplement: s1 [file s1]

# Asymmetric Michael Addition Organocatalyzed by $\alpha,\beta$ -Dipeptides Under Solvent-free Reaction Conditions

C. Gabriela Avila-Ortiz <sup>1</sup>, Lenin Díaz-Corona, Erika Jiménez-González,<sup>1</sup>  
Eusebio Juaristi <sup>1,2,\*</sup>

<sup>1</sup> Departamento de Química, Centro de Investigación y de Estudios Avanzados, Instituto Politécnico Nacional, Avenida I. P. N. 2508, 07360-Ciudad de México, Mexico.

<sup>2</sup> El Colegio Nacional, Luis González Obregón 23, Centro Histórico, 06020-Ciudad de México, México.

\* Author to whom correspondence should be addressed; E-Mail: juaristi@relaq.mx; Tel.: +52-55-5747-3722; Fax: +52-55-5747-3897.

## Supporting Information

### Table of contents

|                                                         |    |
|---------------------------------------------------------|----|
| 1. Synthesis of L-phenylalanylglycine.....              | 2  |
| 2. Reaction Optimization Tables .....                   | 3  |
| 3. Experimental Properties of the Michael Adducts ..... | 6  |
| 4. Bibliography .....                                   | 30 |

## 1. Synthesis of L-phenylalanylglycine

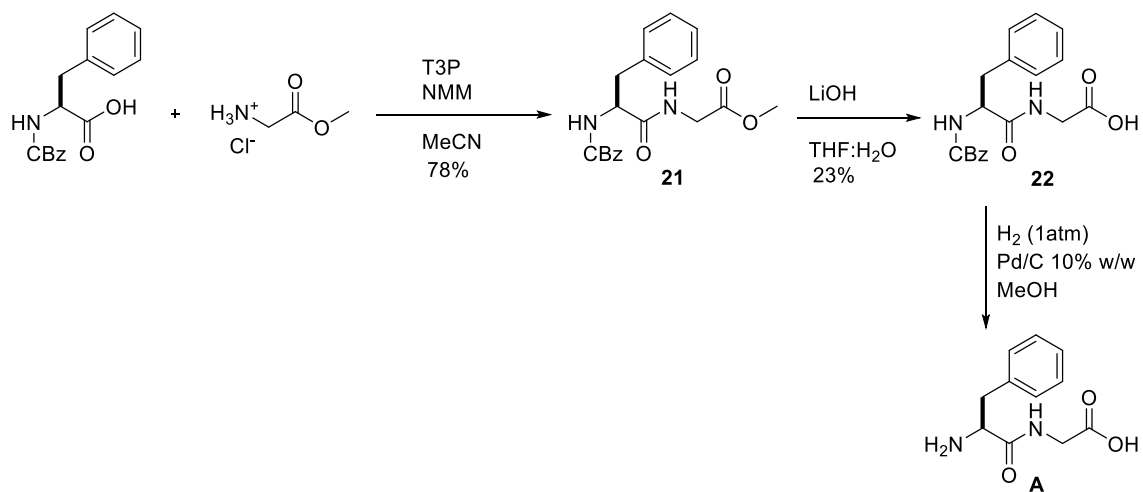

**Scheme A:** Synthetic route of L-phenylalanylglycine

## 2. Reaction Optimization Tables

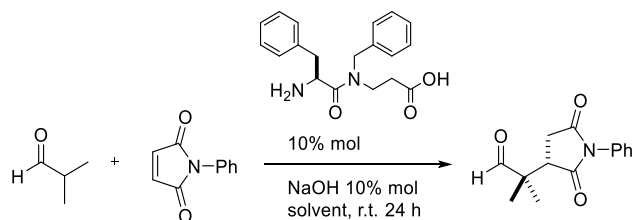

**Table A. Effect of the solvent on the Michael addition reaction of isobutyraldehyde to *N*-phenylmaleimide.**

| Essay <sup>[a]</sup> | Solvent                         | Yield <sup>[b]</sup><br>[%] | er <sup>[c]</sup> |
|----------------------|---------------------------------|-----------------------------|-------------------|
| 1                    | EtOH                            | n.r.                        | n.d.              |
| 2                    | Toluene                         | n.r.                        | n.d.              |
| 3                    | H <sub>2</sub> O                | n.r.                        | n.d.              |
| 4                    | CH <sub>2</sub> Cl <sub>2</sub> | 77                          | 88 : 12           |
| 5                    | Brine                           | n.r.                        | n.d.              |
| 6                    | THF                             | n.r.                        | n.d.              |
| 7                    | DMSO                            | n.r.                        | n.d.              |
| 8                    | MeOH                            | n.r.                        | n.d.              |
| 9                    | CH <sub>3</sub> CN              | n.r.                        | n.d.              |

[a] Reaction conditions: aldehyde (5.5 mmol), maleimide (0.5 mmol), NaOH was used in the same amount as **2**, and 0.5 mL of the indicated solvent. [b] Isolated yield. [c] Determined by chiral HPLC.

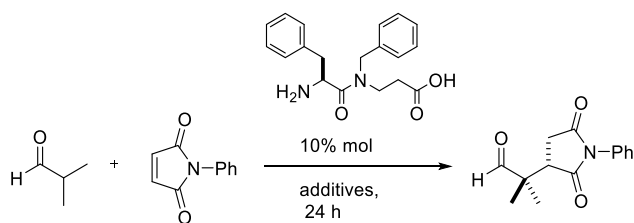

**Table B: Effect of additives and temperature on the Michael addition reaction of isobutyraldehyde to *N*-phenylmaleimide.**

| Essay <sup>[a]</sup> | H--Donor   | Base | Temperature<br>[° C] | Yield <sup>[b]</sup><br>[%] | er <sup>[c]</sup> |
|----------------------|------------|------|----------------------|-----------------------------|-------------------|
| 1                    | Urea       | NaOH | 25                   | 80                          | 68 : 32           |
| 2                    | Urea       | DMAP | 25                   | 40                          | 71 : 29           |
| 3                    | Thiourea   | NaOH | 25                   | 75                          | 73 : 27           |
| 4                    | Thiourea   | DMAP | 25                   | 43                          | n. d.             |
| 5                    | Sulphamide | NaOH | 25                   | 67                          | 75 : 25           |
| 6                    | Sulphamide | DMAP | 25                   | 16                          | n. d.             |
| 7                    | Urea       | NaOH | 2                    | 80                          | 65 : 35           |
| 8                    | Thiourea   | NaOH | 2                    | 81                          | 70 : 30           |
| 9                    | Sulphamide | NaOH | 2                    | 82                          | 66 : 34           |
| 10                   | -----      | NaOH | 2                    | 79                          | 86 : 14           |

[a] Reaction conditions: aldehyde (2.75 mmol), maleimide (0.5 mmol), additives were used in the same amount as catalyst 2. [b] Isolated yield. [c] Determined by chiral HPLC

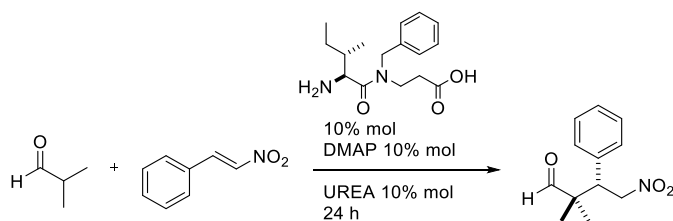

**Table C. Effect of the solvent on the Michael addition reaction of isobutyraldehyde to *trans*- $\beta$ -nitrostyrene.**

| Essay <sup>[a]</sup> | Solvent                         | Yield <sup>[b]</sup><br>[%] | er <sup>[c]</sup> |
|----------------------|---------------------------------|-----------------------------|-------------------|
| 1                    | DMSO                            | n.r.                        | n.d.              |
| 2                    | H <sub>2</sub> O                | 81                          | 93 : 7            |
| 3                    | DMF                             | n.r.                        | n.d.              |
| 4                    | MeOH                            | n.r.                        | n.d.              |
| 5                    | CH <sub>3</sub> CN              | n.r.                        | n.d.              |
| 6                    | CH <sub>2</sub> Cl <sub>2</sub> | 64                          | 94 : 6            |
| 7                    | iPrOH                           | n.r.                        | n.d.              |
| 8                    | Brine                           | n.r.                        | n.d.              |
| 9                    | THF                             | n.r.                        | n.d.              |

[a] Reaction conditions: aldehyde (2.75 mmol), *trans*- $\beta$ -nitrostyrene (0.5 mmol), Additives (DMAP + Hydrogen-bond donor were used in 10% mol) and 0.5 mL of the solvent. [b] Isolated yield. [c] Determined by chiral HPLC.

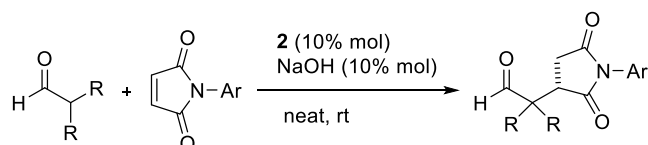

**Table D. Michael Addition Reaction of Aldehydes to Additional Substrates.**

| Essay <sup>[a]</sup> | R                                  | Ar                                                 | Product   | Yield <sup>[b]</sup> | er <sup>[c]</sup> |
|----------------------|------------------------------------|----------------------------------------------------|-----------|----------------------|-------------------|
| 1                    | CH <sub>3</sub>                    | 2-NO <sub>2</sub> -C <sub>4</sub> H <sub>4</sub> - | <b>23</b> | n.r.                 | n.d.              |
| 2                    | -(CH <sub>2</sub> ) <sub>4</sub> - | C <sub>6</sub> H <sub>5</sub> -                    | <b>24</b> | n.r.                 | n.d.              |

[a] Reaction conditions: aldehyde (2.75 mmol), *N*-substituted maleimide (0.5 mmol), cat\* and KOH both 10% mol (0.05 mmol). [b] Isolated yield. [c] Determined by chiral HPLC.

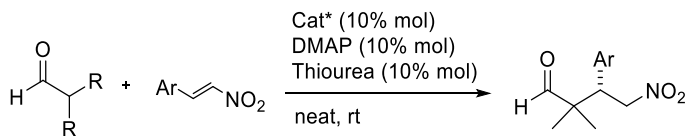

**Table E. Michael Addition Reaction of Aldehydes to Different Substrates.**

| Essay <sup>[a]</sup> | Cat* | R                                  | Ar                              | Product   | Yield <sup>[b]</sup> | er <sup>[c]</sup> |
|----------------------|------|------------------------------------|---------------------------------|-----------|----------------------|-------------------|
| 7                    | 4    | -(CH <sub>2</sub> ) <sub>4</sub> - | C <sub>6</sub> H <sub>5</sub> - | <b>25</b> | n.r.                 | n.d.              |
|                      | 6    |                                    |                                 |           | n.r.                 | n.d.              |
| 8                    | 4    | -(CH <sub>2</sub> ) <sub>5</sub> - | C <sub>6</sub> H <sub>5</sub> - | <b>26</b> | n.r.                 | n.d.              |
|                      | 6    |                                    |                                 |           | n.r.                 | n.d.              |
| 9                    | 4    | CH <sub>2</sub> CH <sub>3</sub>    | C <sub>6</sub> H <sub>5</sub> - | <b>27</b> | n.r.                 | n.d.              |
|                      | 6    |                                    |                                 |           | n.r.                 | n.d.              |

[a] Reaction conditions: aldehyde (2.75 mmol), *trans*- $\beta$ -nitrostyrene (0.5 mmol), Additives (DMAP + thiourea were used in 10% mol). [b] Isolated yield. [c] Determined by chiral HPLC.

### 3. Experimental Properties of the Michael Adducts

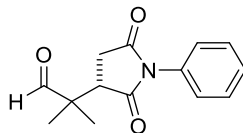

#### (S)-2-(2,5-Dioxo-1-phenylpyrrolidin-3-yl)-2-methylpropanal, **7**

Optical rotation were in agreement with those reported in the literature.<sup>[1,2]</sup> NMR spectra and HPLC chromatograms were in agreement with those reported for the enantiomer in the literature.<sup>[3]</sup>

<sup>1</sup>H NMR (270 MHz, CDCl<sub>3</sub>) (ppm): 1.25 (s, 3H), 1.30 (s, 3H), 2.59 (dd, *J*<sub>1</sub> = 5.5, *J*<sub>2</sub> = 18.1 Hz, 1H), 2.77 (dd, *J*<sub>1</sub> = 9.5, *J*<sub>2</sub> = 18.1 Hz, 1H), 3.12 (dd, *J*<sub>1</sub> = 5.4, *J*<sub>2</sub> = 9.5 Hz, 1H), 7.23-7.48 (m, 5H), 9.48 (s, 1H).

<sup>13</sup>C NMR (67.93 MHz, CDCl<sub>3</sub>) (ppm): 19.6, 20.4, 31.9, 45.06, 48.6, 126.6, 128.8, 129.3, 131.8, 174.9, 177.0, 202.8.

$[\alpha]_D^{25^\circ\text{C}} = -1.1$  (c = 0.333, CHCl<sub>3</sub>).

HPLC (Chiralcel OD-H, hexane/*i*-PrOH 80/20, 1 mL/min,  $\lambda = 210$  nm): *t*<sub>major</sub> = 17 min, *t*<sub>minor</sub> = 22 min.

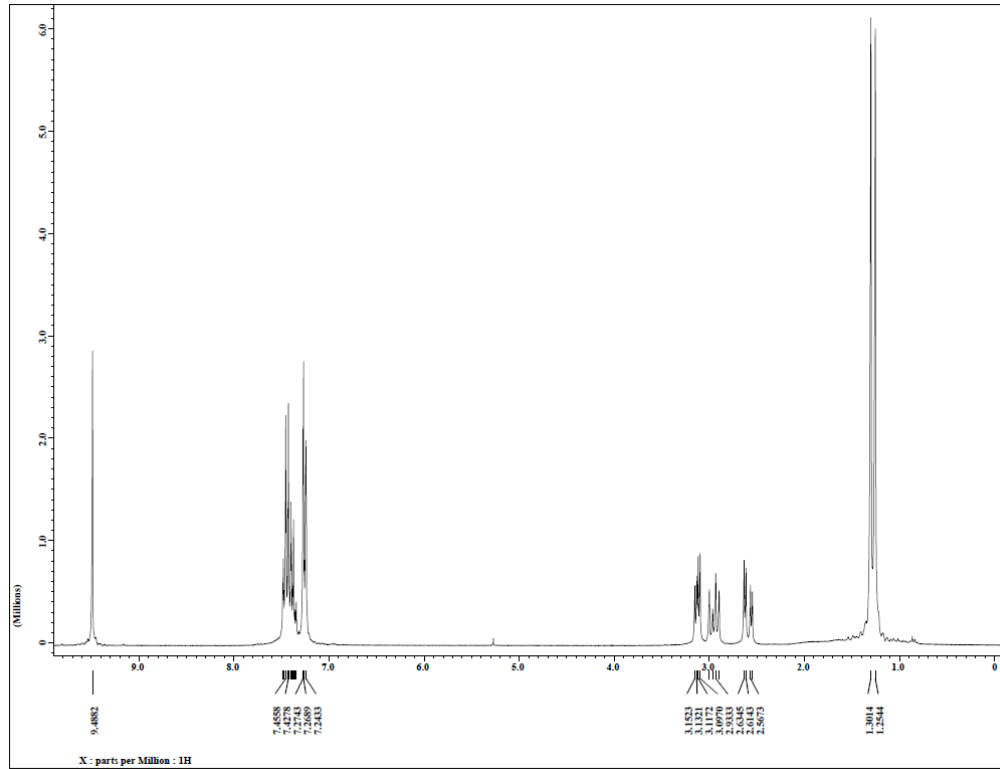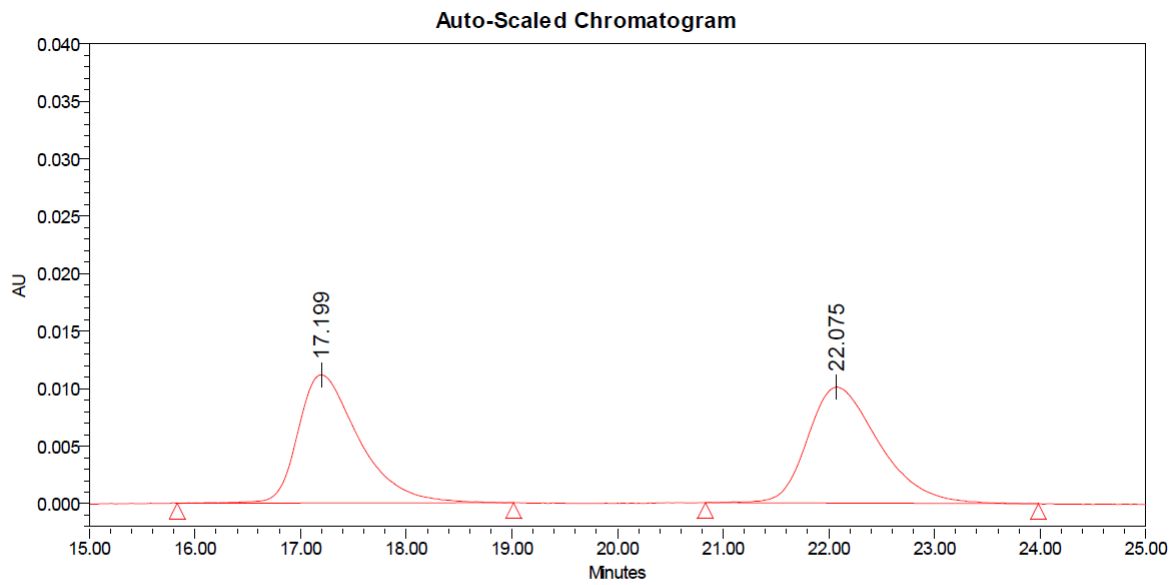

| Peak Results |        |        |        |        |
|--------------|--------|--------|--------|--------|
|              | RT     | Area   | Height | % Area |
| 1            | 17.199 | 446710 | 11149  | 48.56  |
| 2            | 22.075 | 473221 | 10096  | 51.44  |

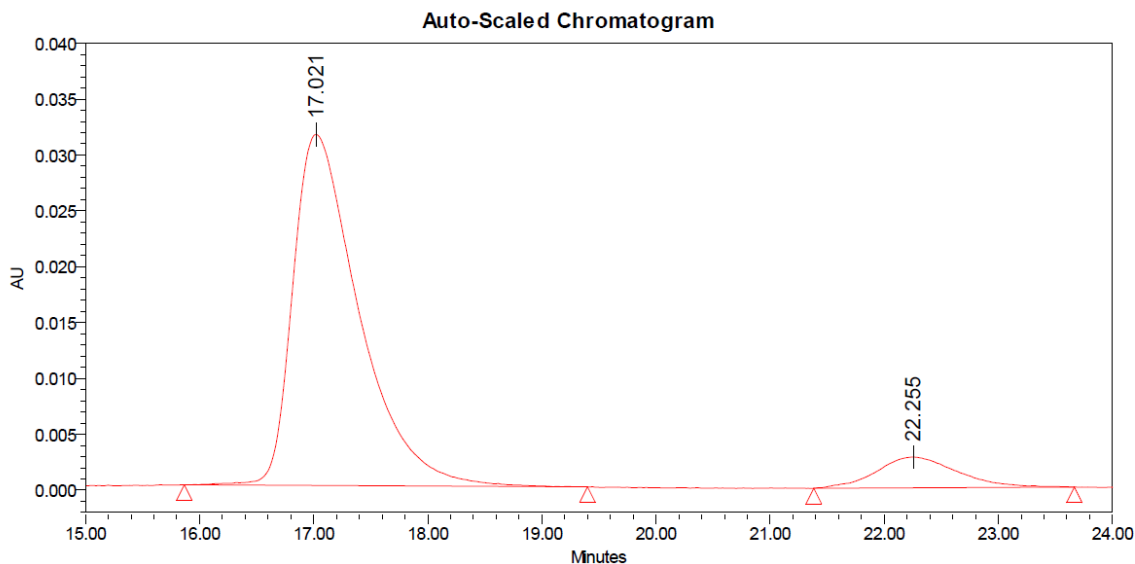

**Peak Results**

|   | RT     | Area    | Height | % Area |
|---|--------|---------|--------|--------|
| 1 | 17.021 | 1266540 | 31437  | 90.36  |
| 2 | 22.255 | 135076  | 2753   | 9.64   |

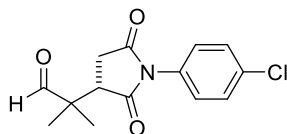

**(S)-2-(1-(4-Chlorophenyl)-2,5-dioxopyrrolidin-3-yl)-2-methylpropanal, 9**

Optical rotation was in agreement with that previously reported in the literature.<sup>[2]</sup> NMR and HPLC in agreement with those reported in the literature for the enantiomeric compound.<sup>[3]</sup>

<sup>1</sup>H NMR (500 MHz, CDCl<sub>3</sub>) (ppm): 1.25 (s, 3H), 1.32 (s, 3H), 2.59 (dd,  $J_1 = 5.6$ ,  $J_2 = 18.4$  Hz, 1H), 2.94 (dd,  $J_1 = 9.6$ ,  $J_2 = 18.3$  Hz, 1H), 3.08 (dd,  $J_1 = 5.6$ ,  $J_2 = 9.5$  Hz, 1H), 7.23 (d,  $J_{A-B} = 8.8$  Hz, 2H), 7.32 (d,  $J_{A-B} = 8.8$ , 2H), 9.46 (s, 1H).

<sup>13</sup>C NMR (125.76 MHz, CDCl<sub>3</sub>) (ppm): 19.9, 20.6, 32.0, 45.0, 48.8, 127.9, 129.5, 130.4, 134.6, 174.6, 176.8, 202.9.

$[\alpha]_D^{25^\circ\text{C}} = -1.5$  (c = 0.333, CH<sub>2</sub>Cl<sub>2</sub>).

HPLC (Chiralcel OD-H, hexane/*i*-PrOH 75/25, 0.6 mL/min,  $\lambda = 210$  nm):  $t_{\text{major}} = 27$  min,  $t_{\text{minor}} = 44$  min.



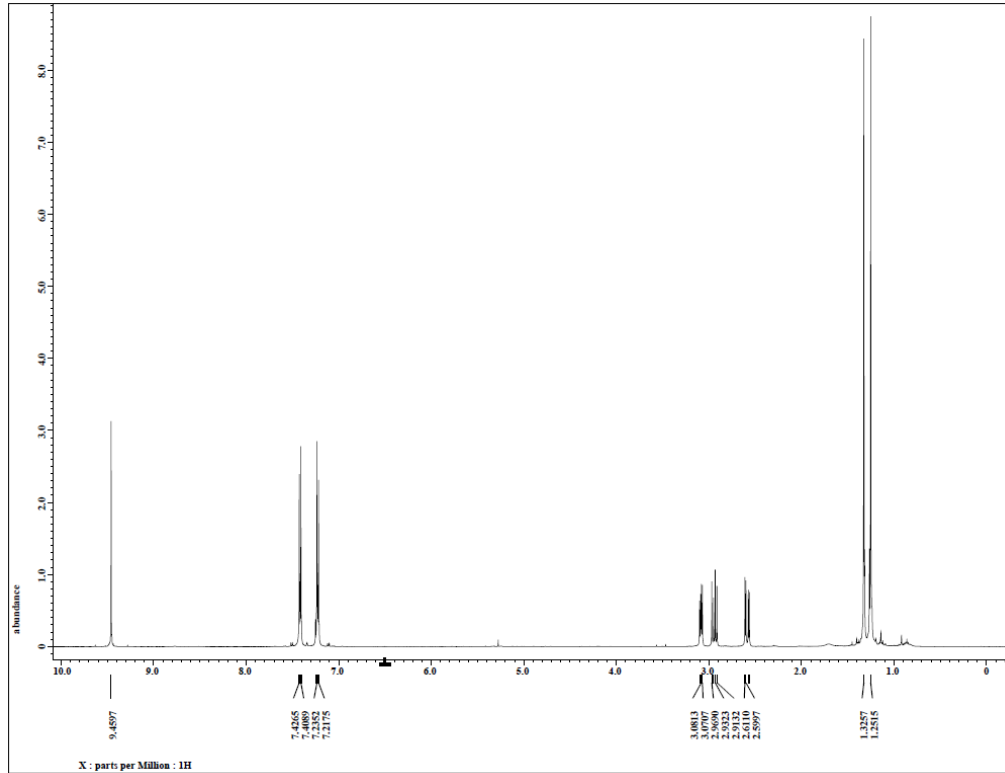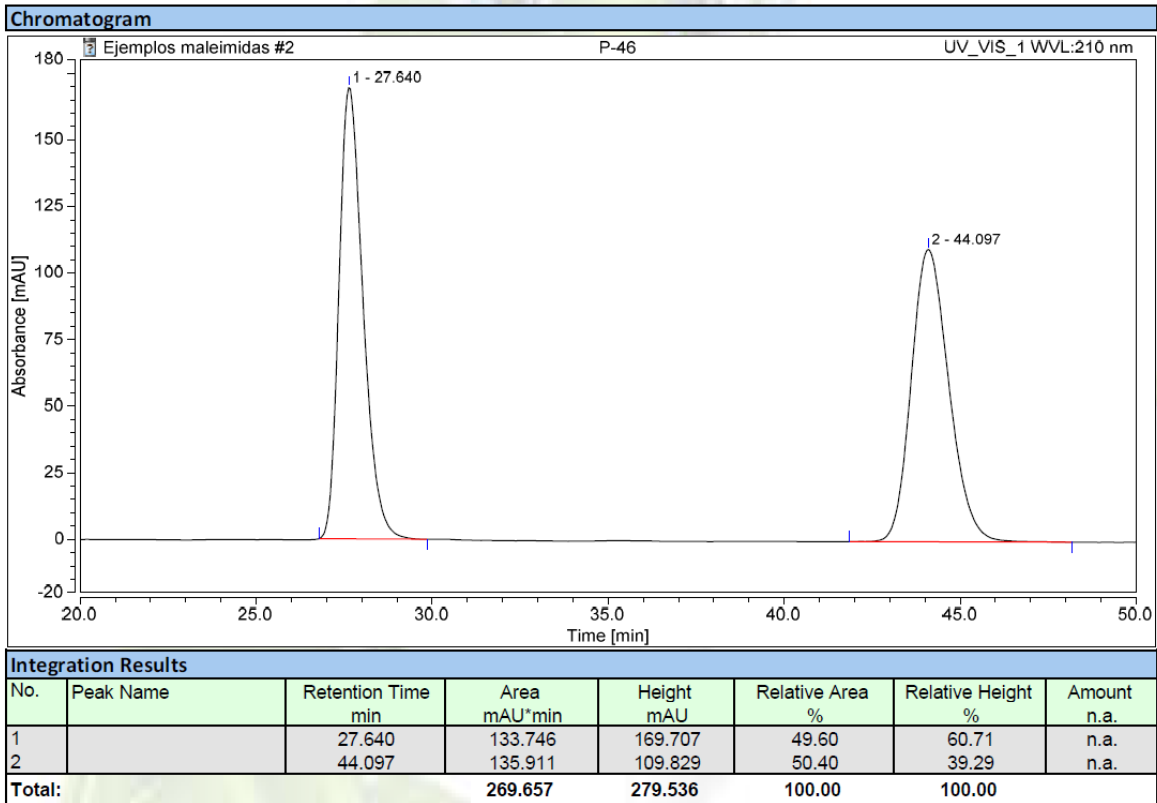

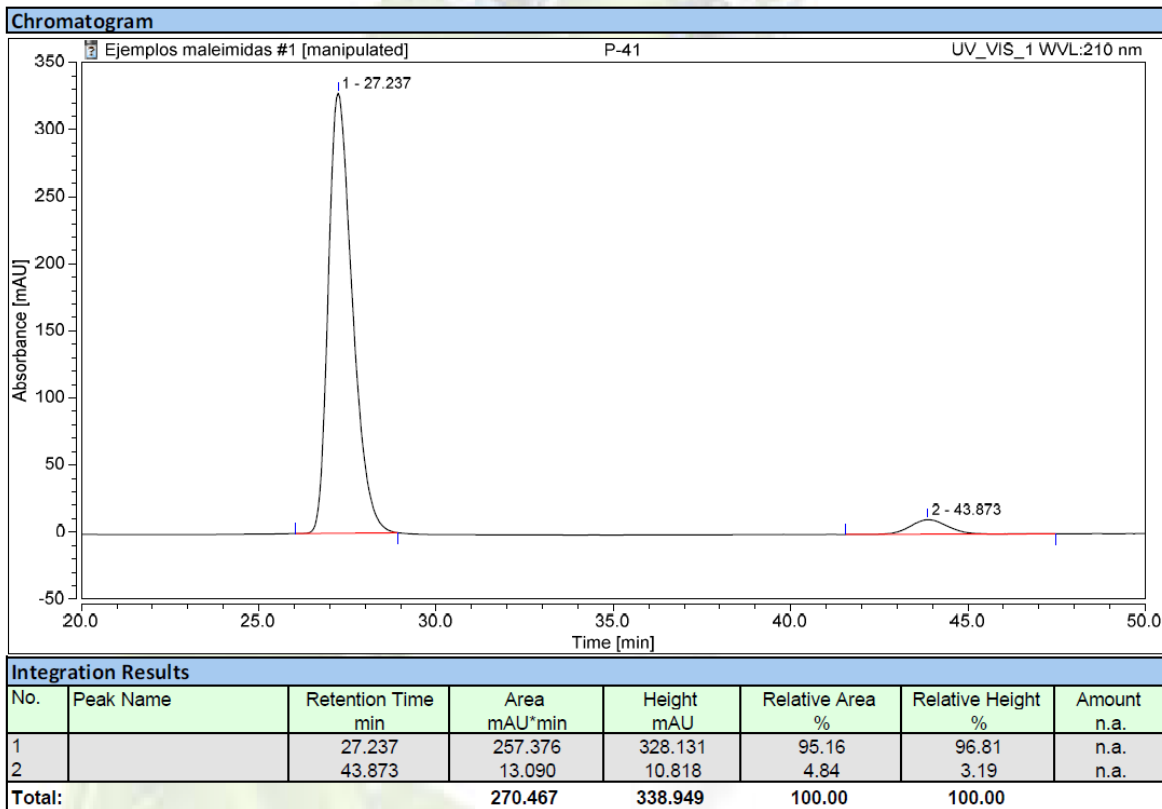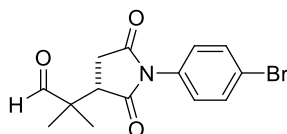

**(S)-2-(1-(4-Bromophenyl)-2,5-dioxopyrrolidin-3-yl)-2-methylpropanal, 10.**

Optical rotation was in agreement with that previously reported.<sup>[1]</sup> NMR spectra and HPLC in agreement with those reported in the literature for the enantiomeric compound.<sup>[3]</sup>

<sup>1</sup>H NMR (500 MHz, CDCl<sub>3</sub>) (ppm): 1.27 (s, 3H), 1.34 (s, 3H), 2.59 (dd, *J*<sub>1</sub> = 5.6, *J*<sub>2</sub> = 18.4 Hz, 1H), 2.95 (dd, *J*<sub>1</sub> = 9.5, *J*<sub>2</sub> = 18.3 Hz, 1H), 3.09 (dd, *J*<sub>1</sub> = 5.6, *J*<sub>2</sub> = 9.5 Hz, 1H), 7.17 (d, *J*<sub>A-B</sub> = 8.6 Hz, 2H), 7.58 (d, *J*<sub>A-B</sub> = 8.6, 2H), 9.47 (s, 1H).

<sup>13</sup>C NMR (125.76 MHz, CDCl<sub>3</sub>) (ppm): 20.0, 20.6, 32.0, 45.1, 48.8, 122.6, 128.1, 130.9, 132.4, 174.5, 176.6, 202.8.

$[\alpha]_D^{25^\circ\text{C}} = -1.2$  (*c* = 0.3, CHCl<sub>3</sub>).

HPLC (Chiralcel OD-H, hexane/*i*-PrOH 75/25, 0.6 mL/min,  $\lambda$  = 210 nm): *t*<sub>major</sub> = 28.5 min, *t*<sub>minor</sub> = 47.6 min.

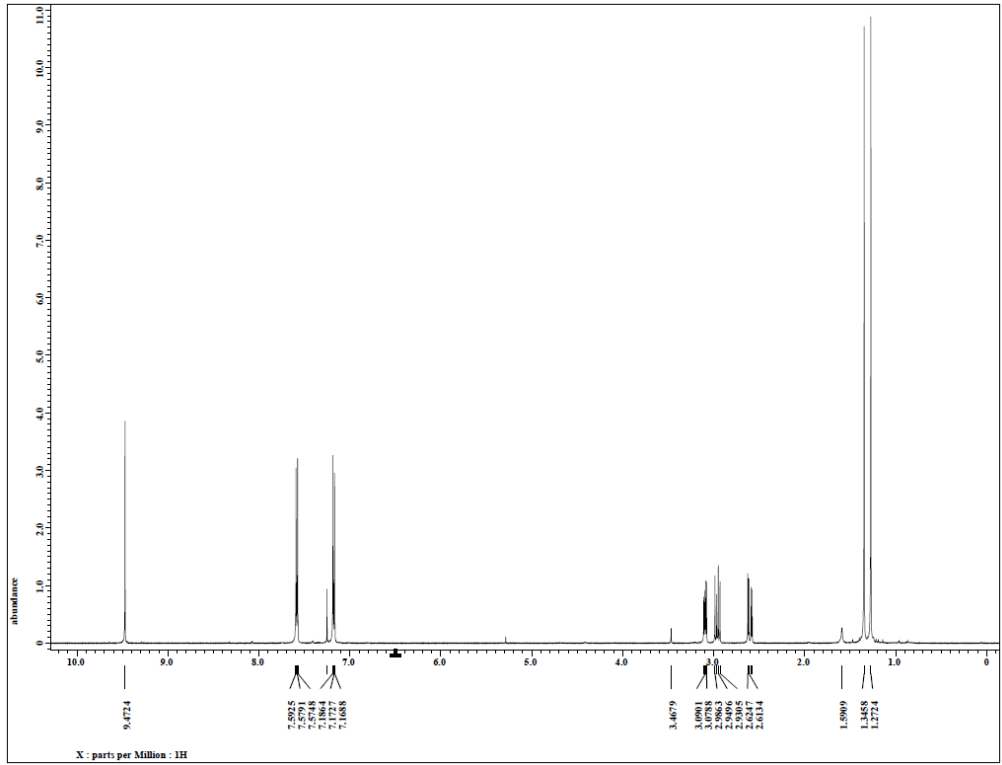

**Chromatogram**

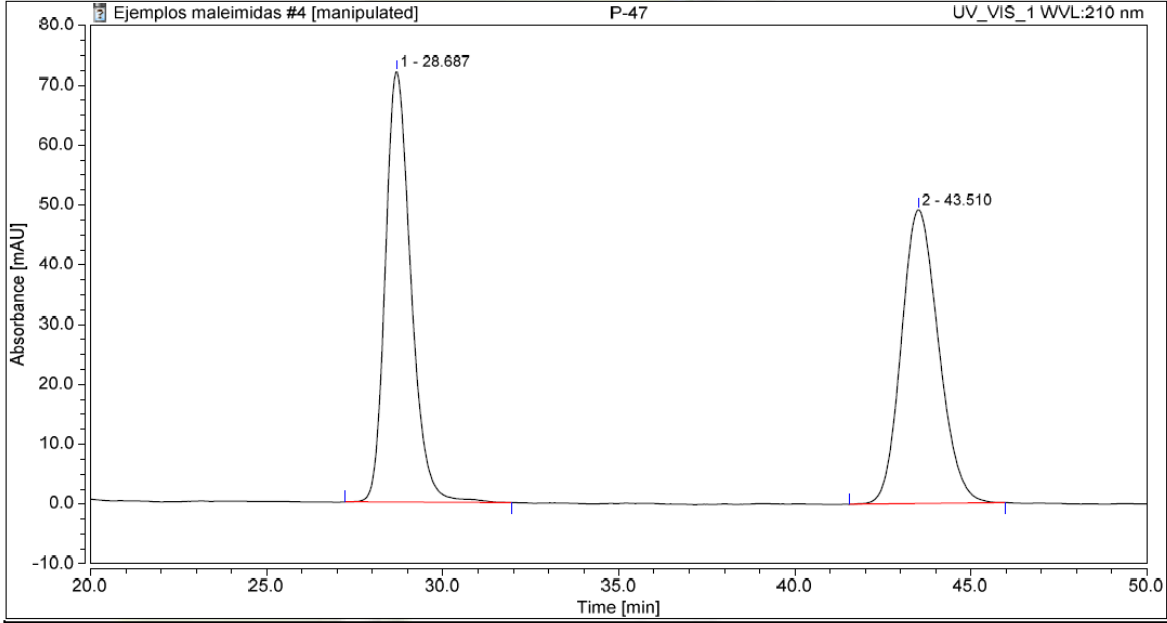

| Integration Results |           |                       |                 |                |                    |                      |        |
|---------------------|-----------|-----------------------|-----------------|----------------|--------------------|----------------------|--------|
| No.                 | Peak Name | Retention Time<br>min | Area<br>mAU*min | Height<br>mAU  | Relative Area<br>% | Relative Height<br>% | Amount |
| 1                   |           | 28.687                | 60.601          | 72.071         | 50.20              | 59.46                | n.a.   |
| 2                   |           | 43.510                | 60.118          | 49.136         | 49.80              | 40.54                | n.a.   |
| <b>Total:</b>       |           |                       | <b>120.719</b>  | <b>121.207</b> | <b>100.00</b>      | <b>100.00</b>        |        |

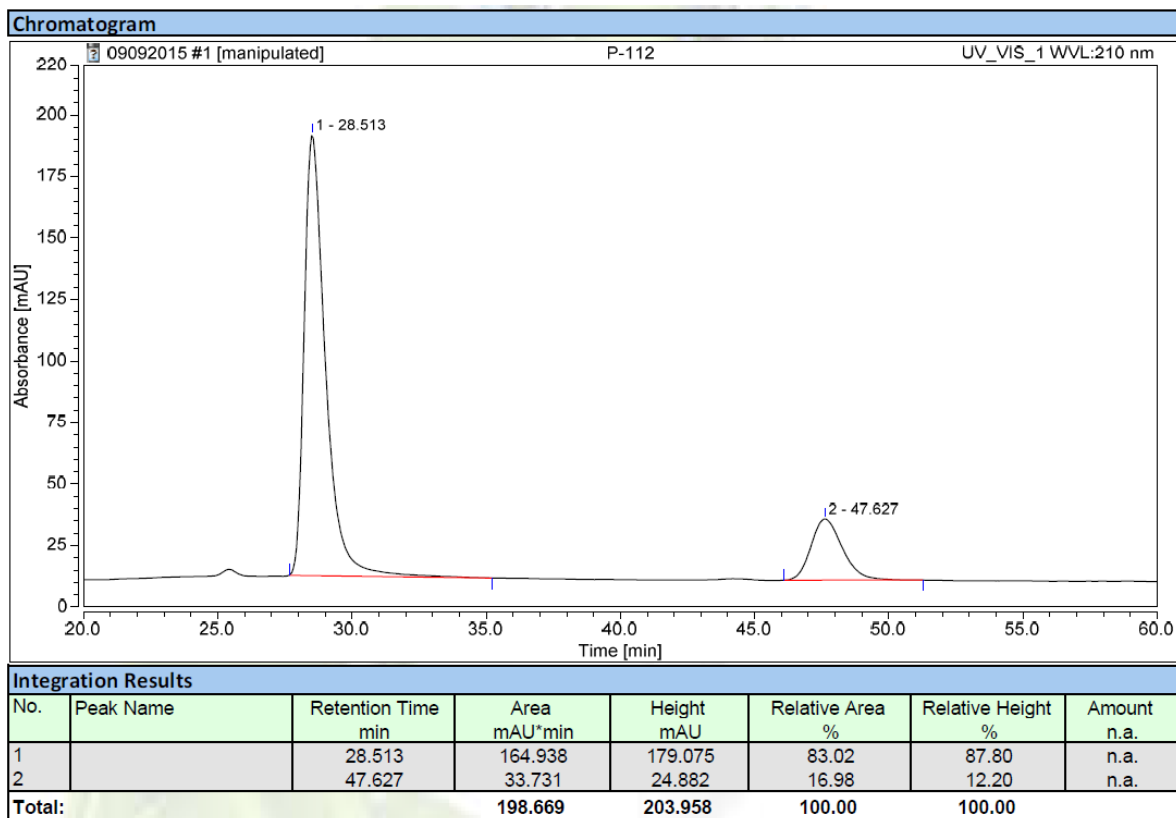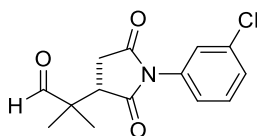

**(S)-2-(1-(3-Chlorophenyl)-2,5-dioxopyrrolidin-3-yl)-2-methylpropanal, 12**

NMR spectra and HPLC were in agreement with those reported in the literature for the enantiomeric compound.<sup>[3]</sup>

<sup>1</sup>H NMR (500 MHz, CDCl<sub>3</sub>) (ppm): 1.28 (s, 3H), 1.36 (s, 3H), 2.61 (dd, *J*<sub>1</sub> = 5.6, *J*<sub>2</sub> = 18.3 Hz, 1H), 2.97 (dd, *J*<sub>1</sub> = 9.5, *J*<sub>2</sub> = 18.3 Hz, 1H), 3.10 (dd, *J*<sub>1</sub> = 5.6, *J*<sub>2</sub> = 9.7 Hz, 1H), 7.10-7.42 (m, 4H), 9.48 (s, 1H).

<sup>13</sup>C NMR (125.76 MHz, CDCl<sub>3</sub>) (ppm): 20.0, 20.6, 32.0, 45.0, 48.8, 124.8, 126.9, 129.0, 130.2, 132.9, 134.8, 174.4, 176.6, 202.8.

[α]<sub>D</sub><sup>25°C</sup> = -5.0 (c = 0.3, CHCl<sub>3</sub>).

HPLC (Chiralcel OD-H, hexane/*i*-PrOH 75/25, 0.9 mL/min, λ = 210 nm): *t*<sub>major</sub> = 20.8 min, *t*<sub>minor</sub> = 25.2 min.

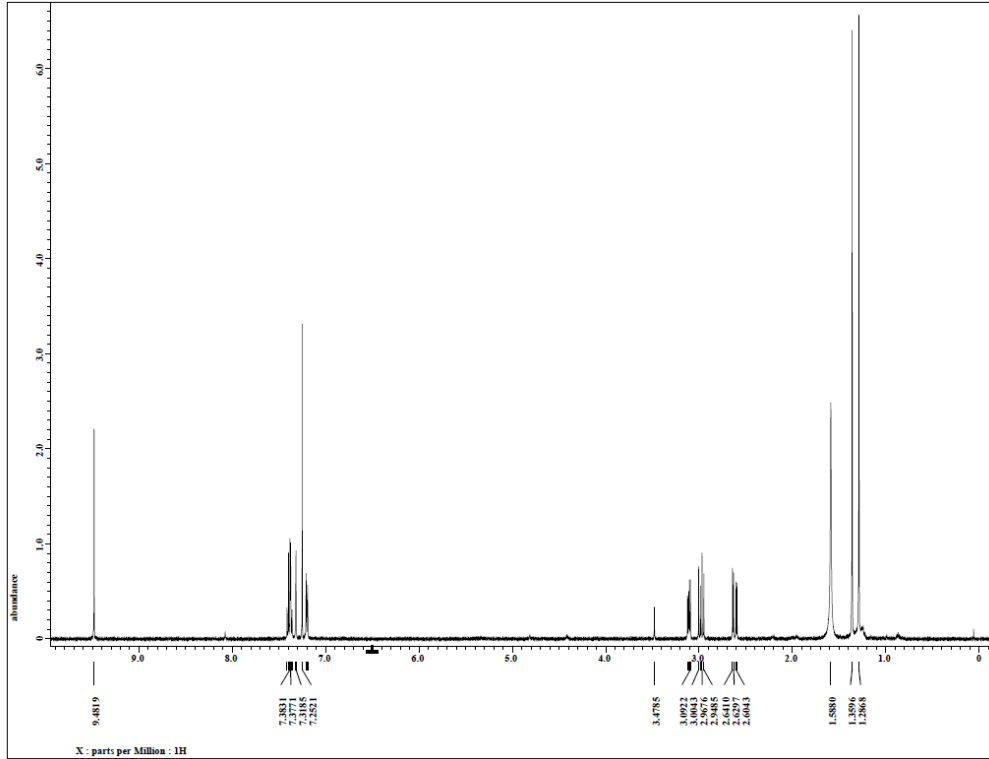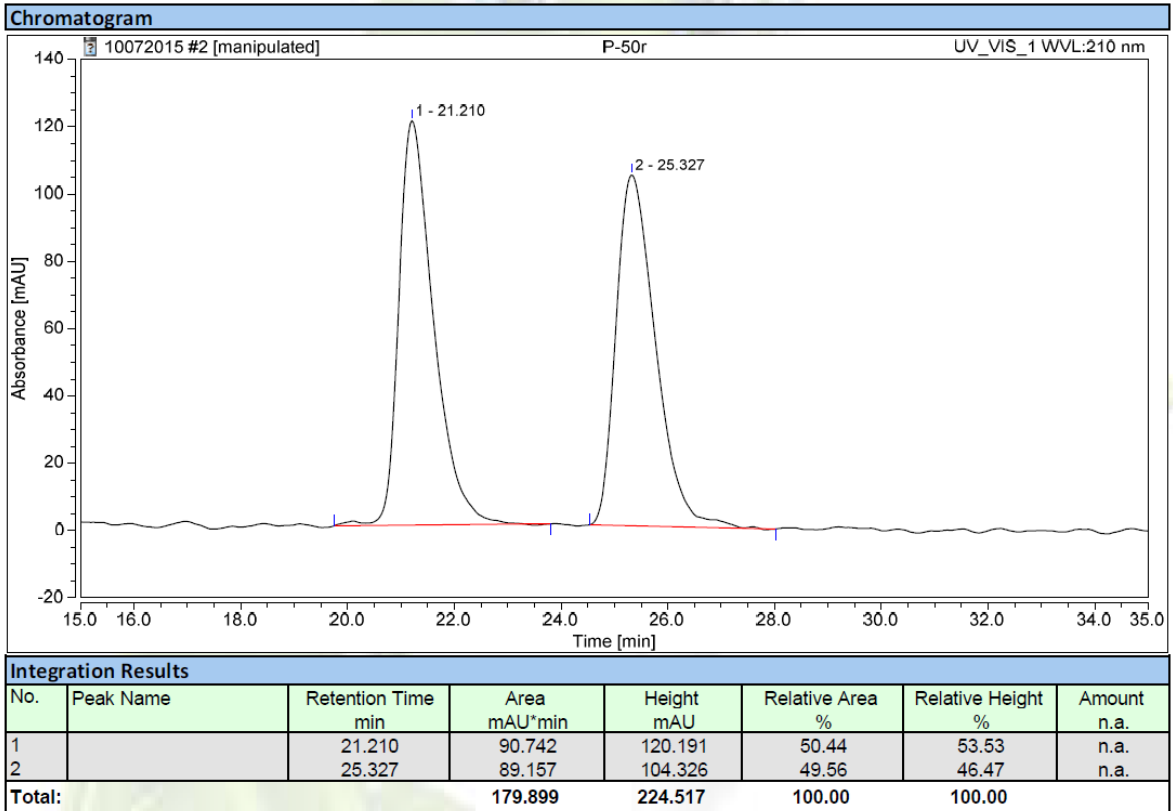

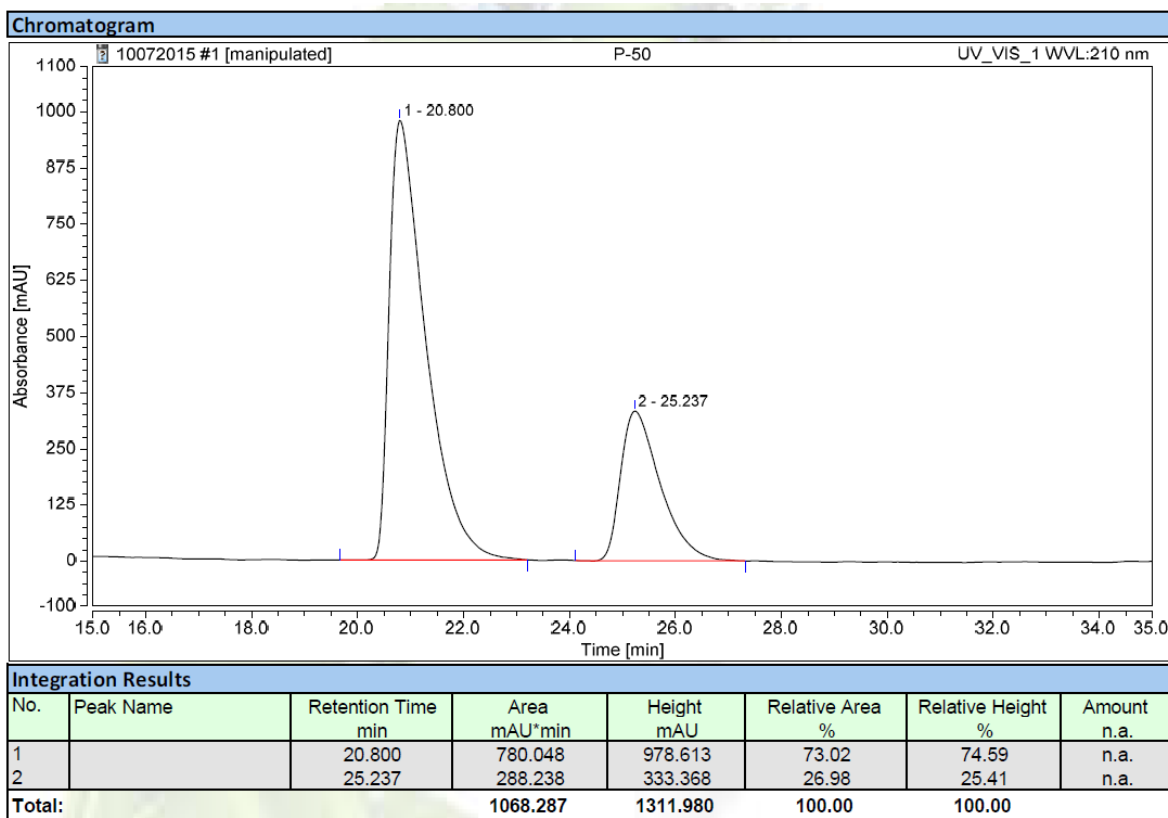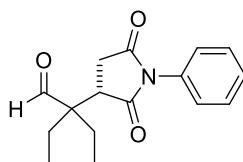

#### (S)-2-(2,5-Dioxo-1-phenylpyrrolidin-3-yl)-2-ethylbutanal, 14

Optical rotation was in agreement with that reported in the literature.<sup>[1]</sup> NMR spectra and HPLC in agreement with those reported in the literature for the enantiomeric compound.<sup>[3]</sup>

<sup>1</sup>H NMR (500 MHz, CDCl<sub>3</sub>) (ppm): 0.94 (t, *J* = 4.5 Hz, 3H), 0.98 (t, *J* = 4.5, 3H), 1.62-2.20 (m, 4H), 2.64 (dd, *J*<sub>1</sub> = 5.8, *J*<sub>2</sub> = 18.4 Hz, 1H), 2.93 (dd, *J*<sub>1</sub> = 9.5, *J*<sub>2</sub> = 18.3 Hz, 1H), 3.22 (dd, *J*<sub>1</sub> = 5.8, *J*<sub>2</sub> = 9.5 Hz, 1H), 7.23-7.45 (m, 5H), 9.59 (s, 1H).

<sup>13</sup>C NMR (125.76 MHz, CDCl<sub>3</sub>) (ppm): 8.14, 8.23, 23.3, 24.4, 31.8, 41.9, 54.6, 126.6, 128.7, 129.2, 132.0, 175.1, 177.4, 204.2.

$[\alpha]_D^{25^\circ\text{C}} = -8.0$  (*c* = 0.3, CH<sub>2</sub>Cl<sub>2</sub>).

HPLC (Chiralcel OD-H, hexane/*i*-PrOH 75/25, 0.5 mL/min,  $\lambda$  = 210 nm): *t*<sub>major</sub> = 30.0 min, *t*<sub>minor</sub> = 52.3 min.

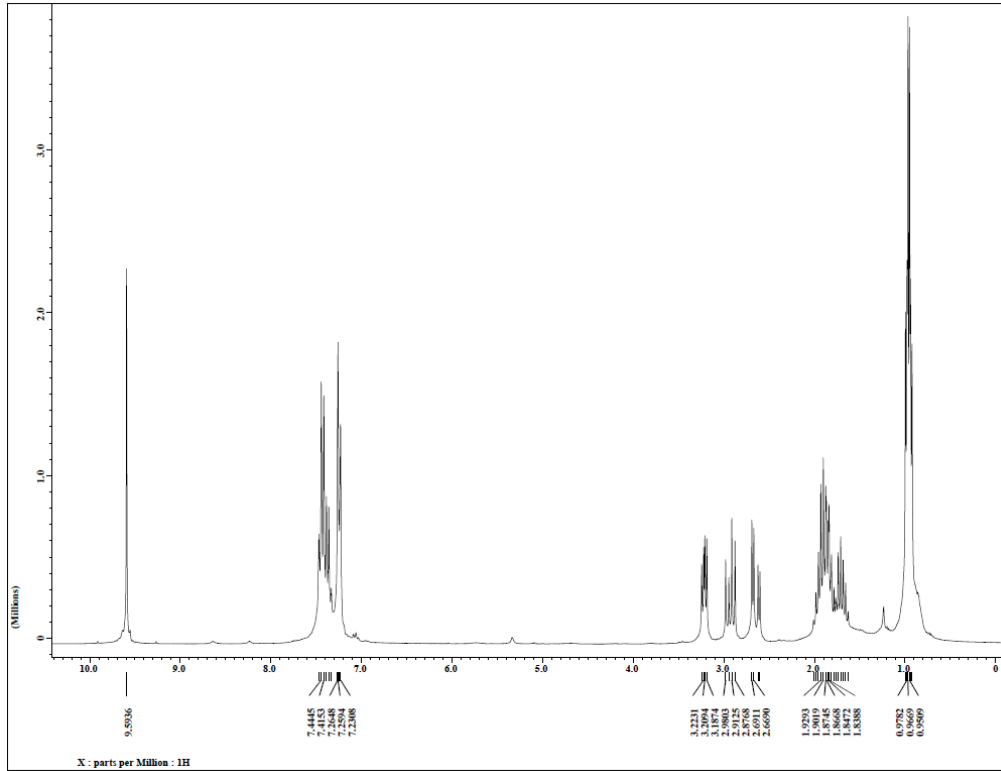

**Chromatogram**

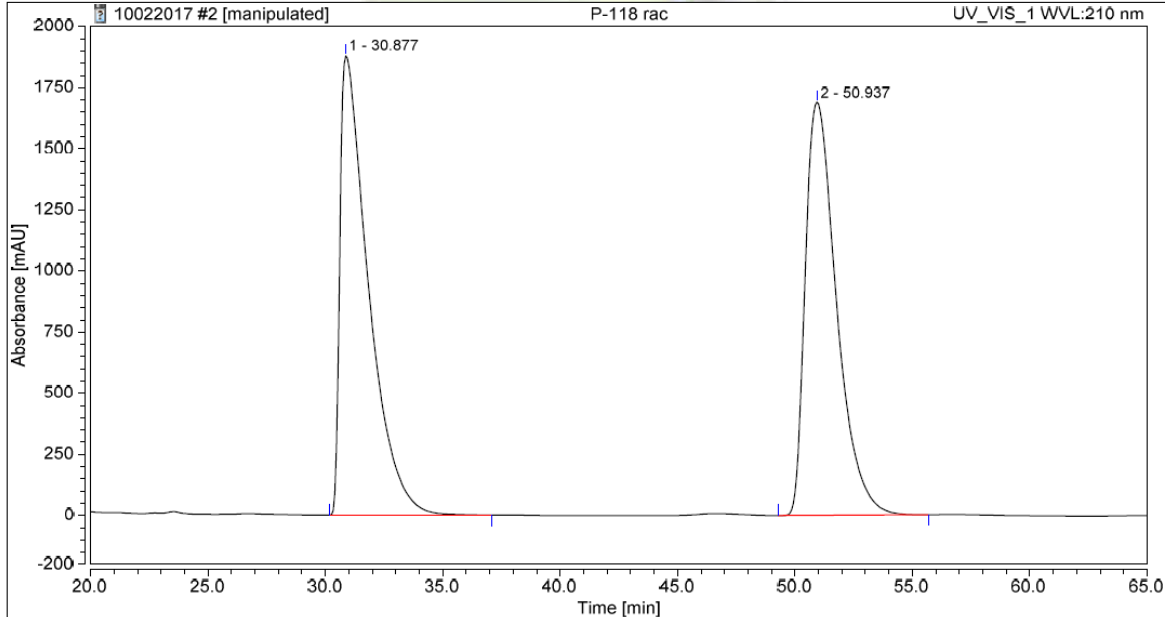

| Integration Results |           |                       |                 |                 |                    |                      |        |
|---------------------|-----------|-----------------------|-----------------|-----------------|--------------------|----------------------|--------|
| No.                 | Peak Name | Retention Time<br>min | Area<br>mAU*min | Height<br>mAU   | Relative Area<br>% | Relative Height<br>% | Amount |
| 1                   |           | 30.877                | 2630.756        | 1878.433        | 50.20              | 52.64                | n.a.   |
| 2                   |           | 50.937                | 2609.411        | 1690.319        | 49.80              | 47.36                | n.a.   |
| <b>Total:</b>       |           |                       | <b>5240.167</b> | <b>3568.752</b> | <b>100.00</b>      | <b>100.00</b>        |        |

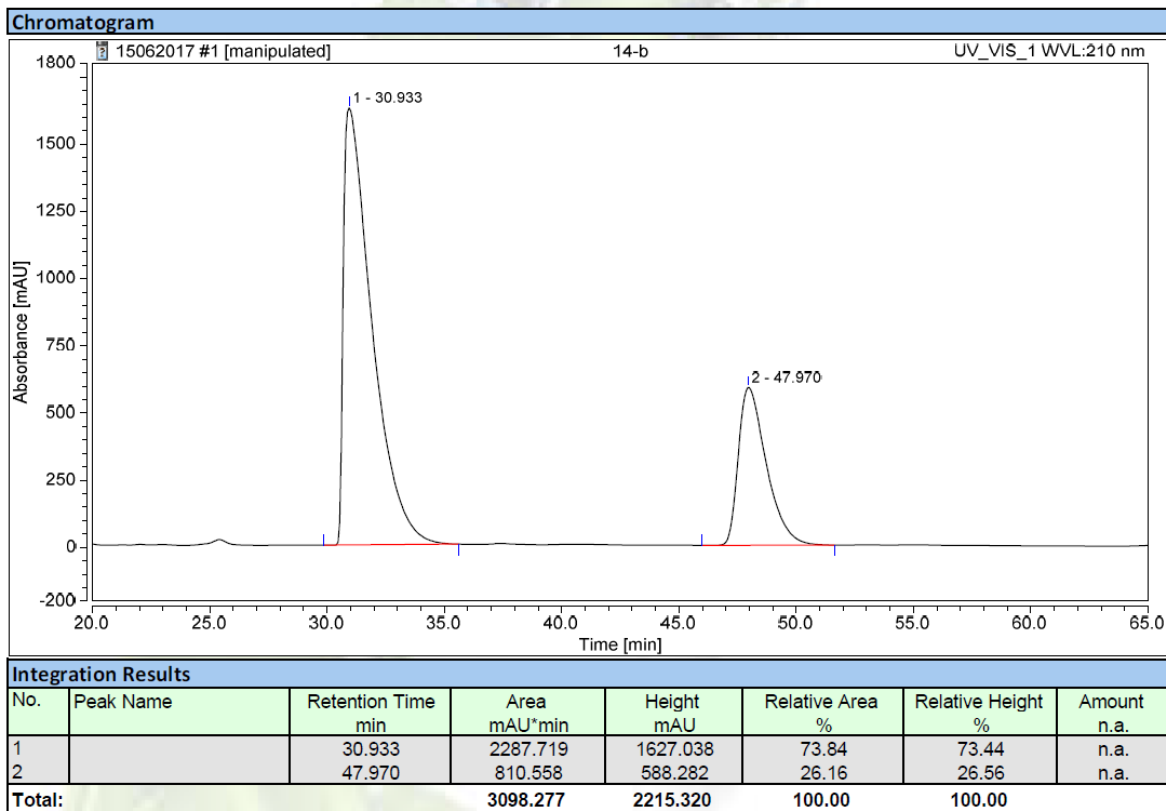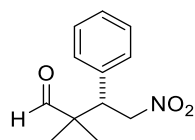

### (S)-2,2-Dimethyl-4-nitro-3-phenylbutanal, **8**

Optical rotation was in agreement with that previously reported.<sup>[4,5]</sup> NMR spectra and HPLC in agreement with those reported in the literature.<sup>[6]</sup>

<sup>1</sup>H NMR (500 MHz, CDCl<sub>3</sub>) (ppm): 0.99 (s, 3H), 1.12 (s, 3H), 3.78 (dd, *J*<sub>1</sub> = 3.9, *J*<sub>2</sub> = 11.3 Hz, 1H), 4.68 (dd, *J*<sub>1</sub> = 3.9, *J*<sub>2</sub> = 13.1 Hz, 1H), 4.85 (dd, *J*<sub>1</sub> = 11.3, *J*<sub>2</sub> = 13 Hz, 1H), 6.86-6.93 (m, 2H), 7.17 (dd, *J*<sub>1</sub> = 1.6, *J*<sub>2</sub> = 7.6 Hz, 1H), 7.24 (m, 1H), 9.49 (s, 1H).

<sup>13</sup>C NMR (125.76 MHz, CDCl<sub>3</sub>) (ppm): 18.9, 21.8, 48.3, 48.5, 76.4, 128.2, 128.8, 129.2, 135.4, 204.4.

$[\alpha]_D^{25^\circ\text{C}} = -1.5$  (c = 0.4, CHCl<sub>3</sub>).

HPLC (Chiralcel OD-H, hexane/*i*-PrOH 80/20, 1 mL/min,  $\lambda = 210$  nm): *t*<sub>minor</sub> = 12.0 min, *t*<sub>major</sub> = 17.1 min.



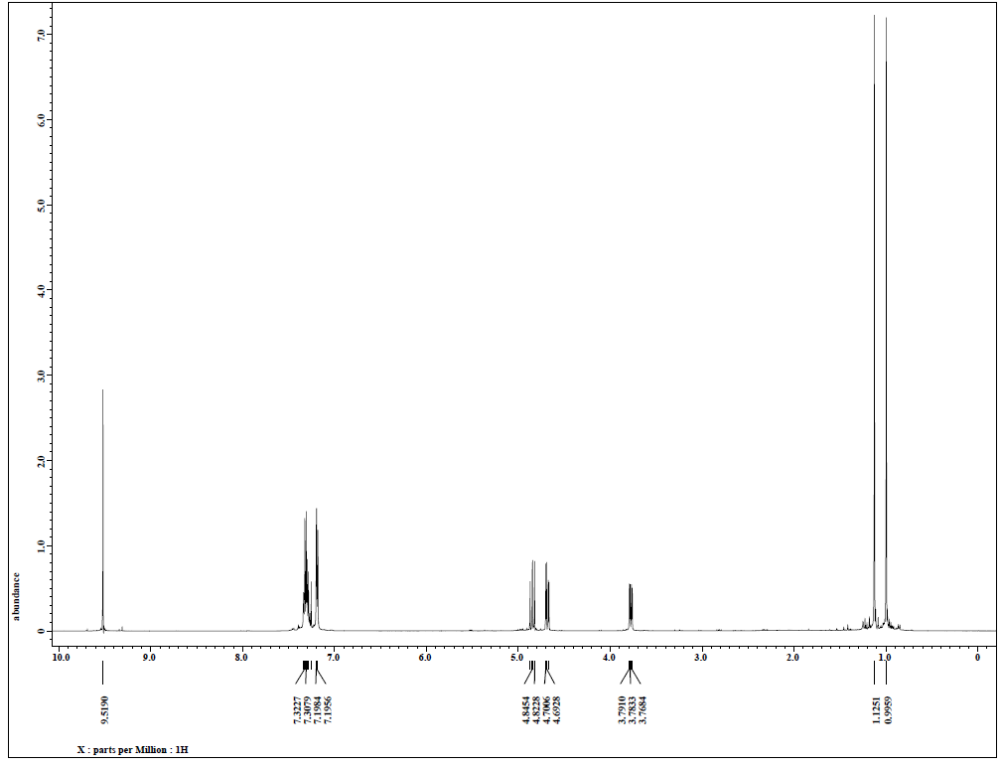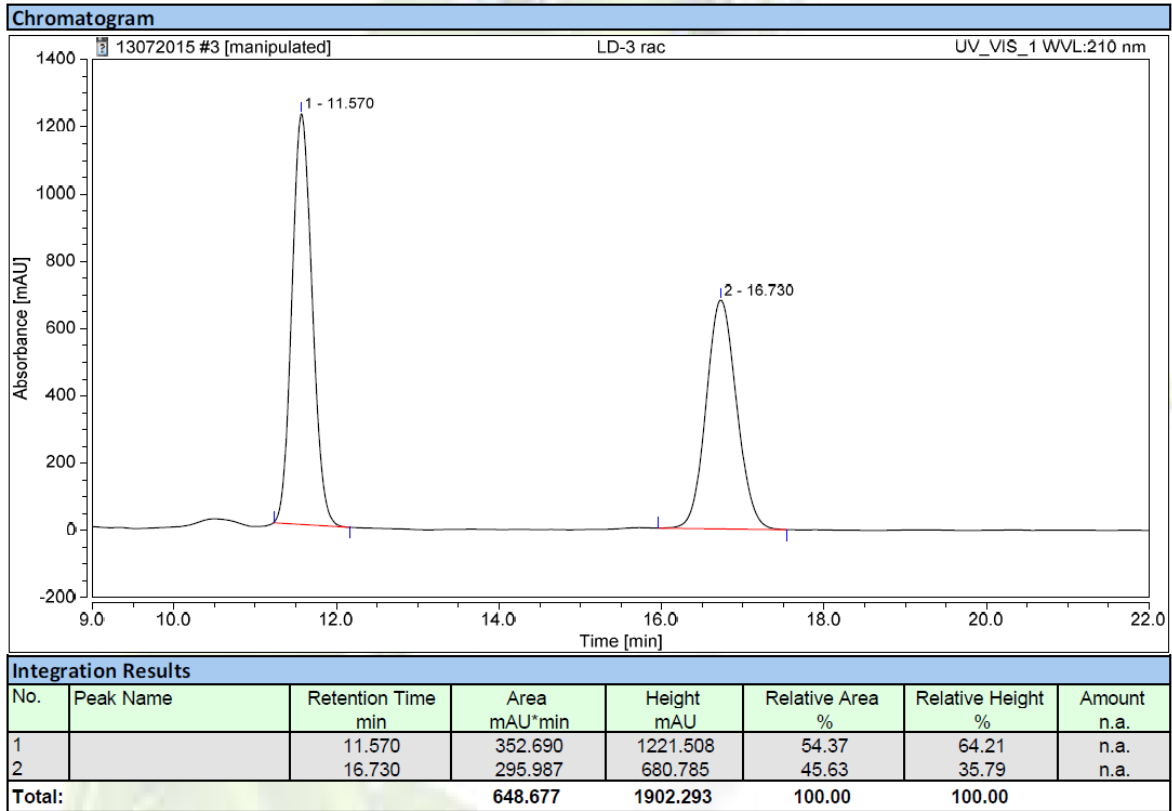

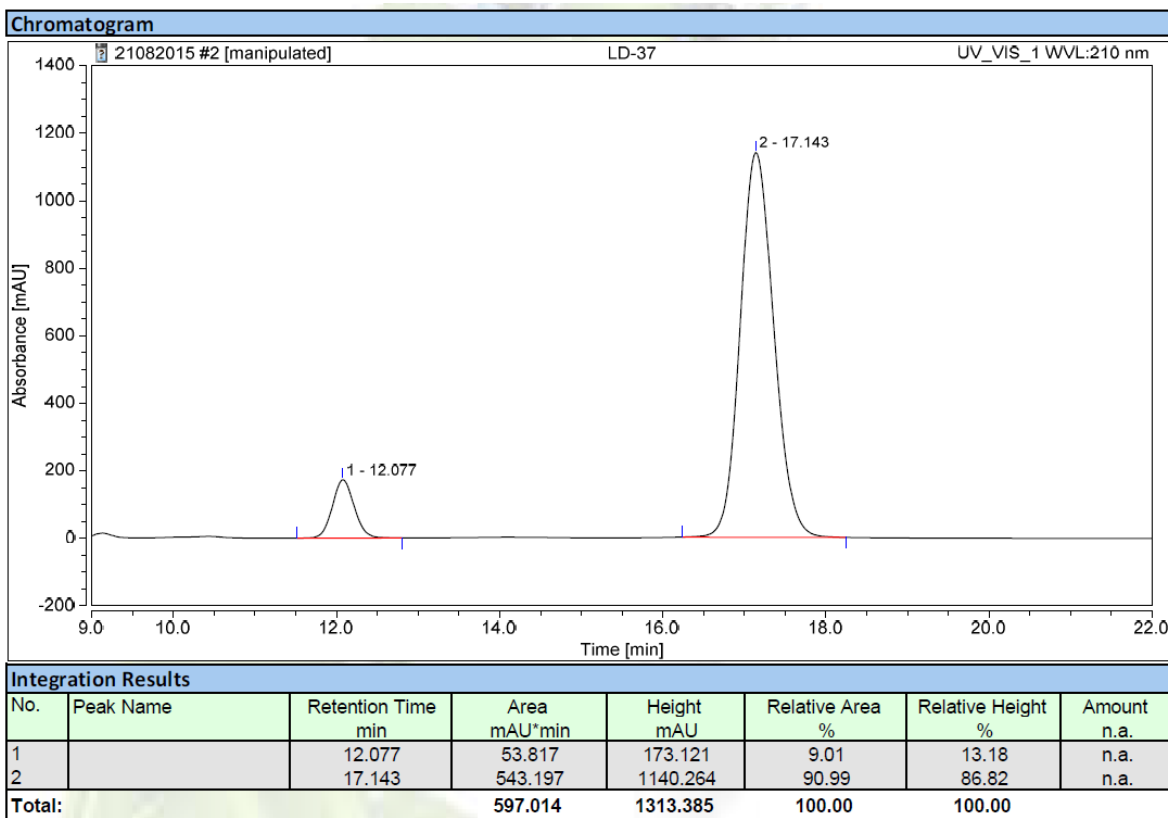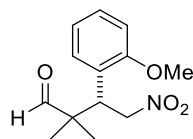

### (S)-3-(2-Methoxyphenyl)-2,2-dimethyl-4-nitrobutanal, 15

NMR spectra and HPLC were in agreement with those reported in the literature.<sup>[6]</sup>

<sup>1</sup>H NMR (500 MHz, CDCl<sub>3</sub>) (ppm): 1.03 (s, 3H), 1.08 (s, 3H), 3.80 (s, 3H), 4.23 (a, 1H), 4.71 (dd, *J*<sub>1</sub> = 4.6, *J*<sub>2</sub> = 13.1 Hz, 1H), 4.89 (dd, *J*<sub>1</sub> = 10.9, *J*<sub>2</sub> = 13.1 Hz, 1H), 6.87-7.28 (m, 4H), 9.51 (s, 1H).

<sup>13</sup>C NMR (125.76 MHz, CDCl<sub>3</sub>) (ppm): 20.0, 21.1, 48.5, 55.4, 55.4, 75.9, 111.4, 120.8, 124.1, 129.4, 129.8, 157.4, 204.2.

[α]<sub>D</sub><sup>25°C</sup> = +11.7 (c = 0.47, CHCl<sub>3</sub>).

HPLC (Chiralcel OD-H, hexane/*i*-PrOH 80/20, 0.8 mL/min, λ = 210 nm): *t*<sub>minor</sub> = 8.9 min., *t*<sub>major</sub> = 13.4 min.

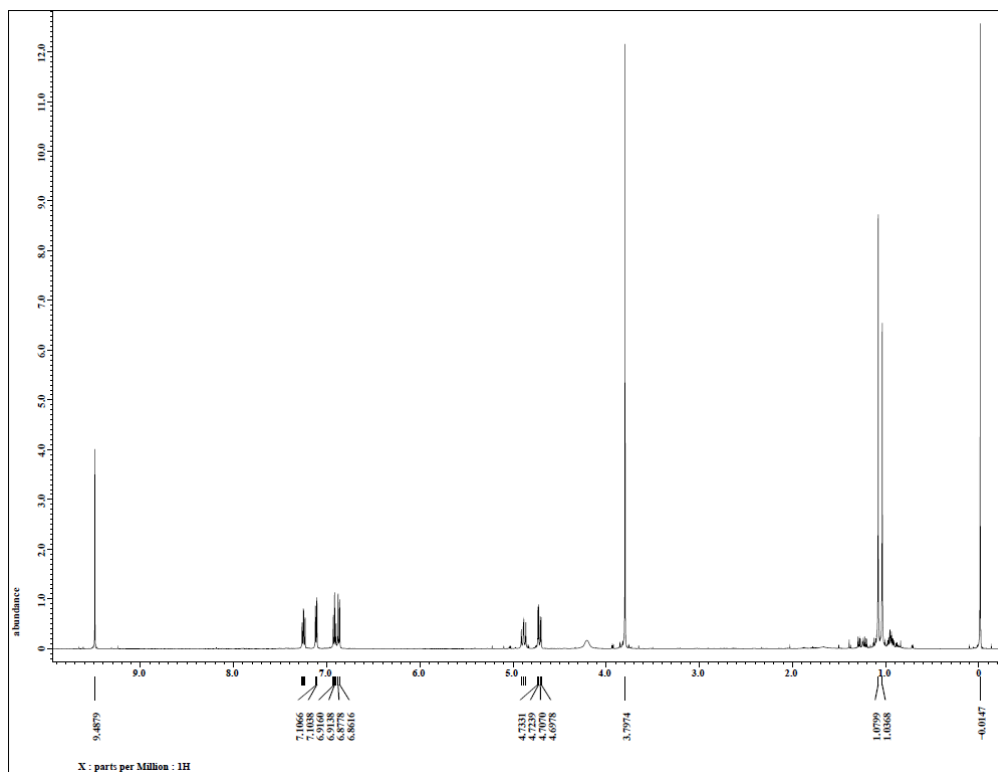

**Chromatogram**

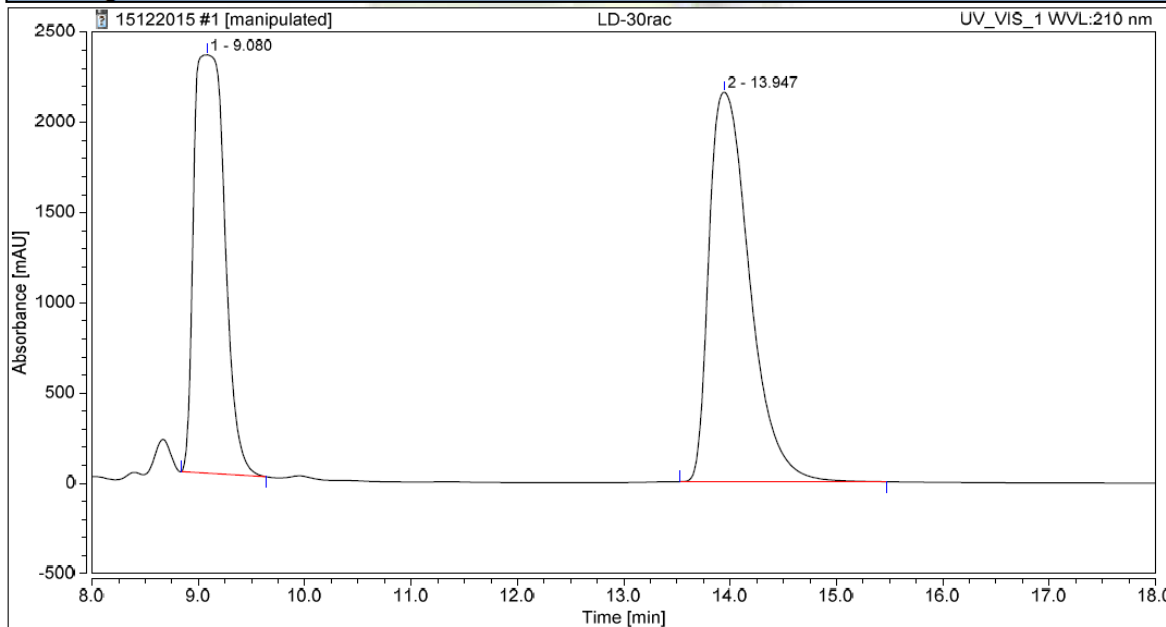

| Integration Results |           |                    |              |            |                 |                   |        |
|---------------------|-----------|--------------------|--------------|------------|-----------------|-------------------|--------|
| No.                 | Peak Name | Retention Time min | Area mAU*min | Height mAU | Relative Area % | Relative Height % | Amount |
| 1                   |           | 9.080              | 778.788      | 2316.848   | 44.94           | 51.78             | n.a.   |
| 2                   |           | 13.947             | 954.301      | 2157.877   | 55.06           | 48.22             | n.a.   |
| Total:              |           |                    | 1733.089     | 4474.726   | 100.00          | 100.00            |        |

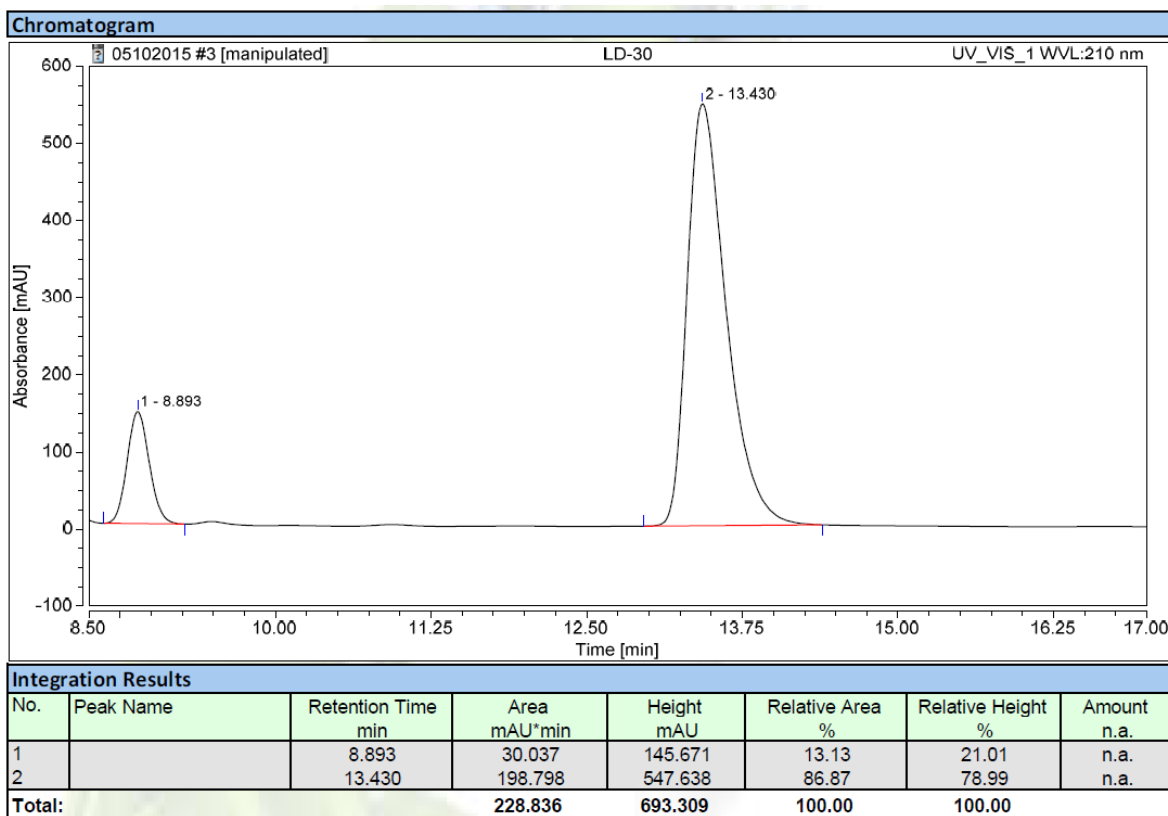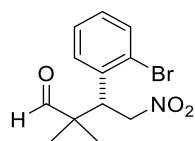

**(R)-3-(2-Bromophenyl)-2,2-dimethyl-4-nitrobutanal, 16.**

Optical rotation was in agreement with that previously reported in the literature.<sup>[4]</sup> NMR spectra and HPLC were in agreement with those reported in the literature.<sup>[6]</sup>

<sup>1</sup>H NMR (500 MHz, CDCl<sub>3</sub>) (ppm): 1.09 (s, 3H), 1.17 (s, 3H), 4.62 (dd, *J*<sub>1</sub> = 3.6, *J*<sub>2</sub> = 11.3 Hz, 1H), 4.72 (dd, *J*<sub>1</sub> = 4.2, *J*<sub>2</sub> = 13.6 Hz, 1H), 4.80 (dd, *J*<sub>1</sub> = 11.3, *J*<sub>2</sub> = 13.1 Hz, 1H), 7.13-7.63 (m, 4H), 9.55 (s, 1H).

<sup>13</sup>C NMR (125.76 MHz, CDCl<sub>3</sub>) (ppm): 18.9, 21.1, 45.4, 49.2, 76.5, 127.0, 127.9, 128.4, 129.6, 134.0, 135.6, 203.9.

$[\alpha]_D^{25^\circ\text{C}} = -0.66$  (c = 0.46, CHCl<sub>3</sub>).

HPLC (Chiralcel OD-H, hexane/*i*-PrOH 80/20, 1 mL/min,  $\lambda = 210$  nm): *t*<sub>minor</sub> = 10.9 min., *t*<sub>major</sub> = 29.0 min.

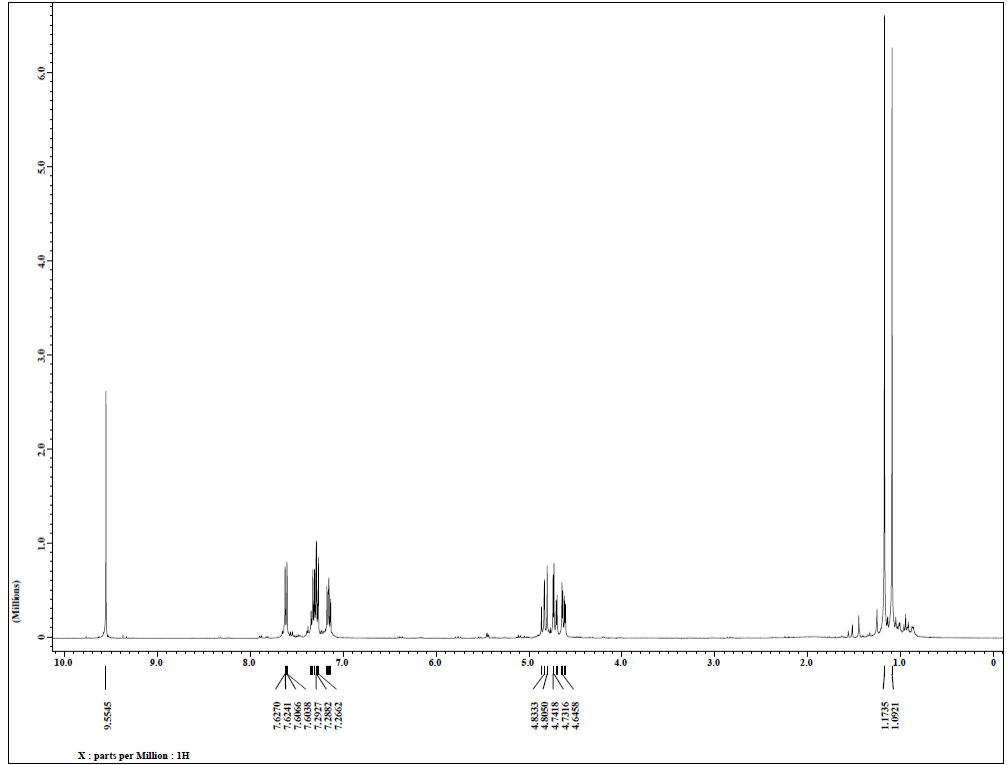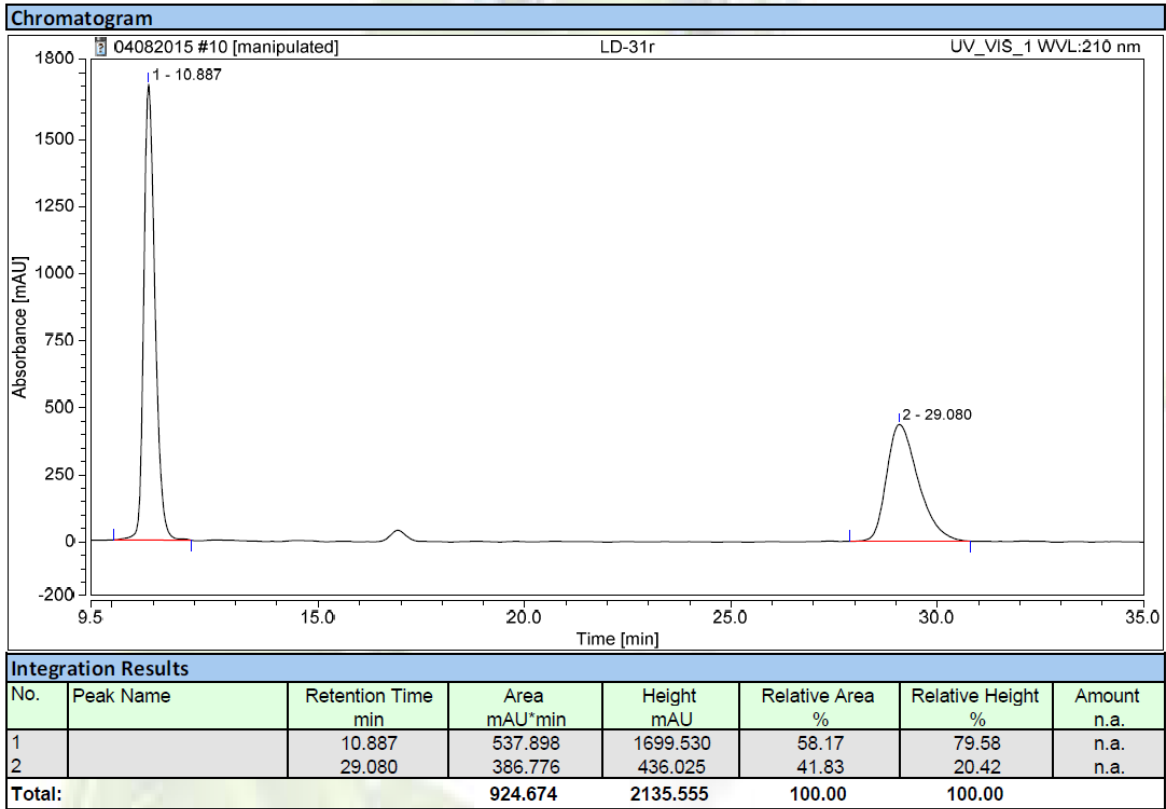

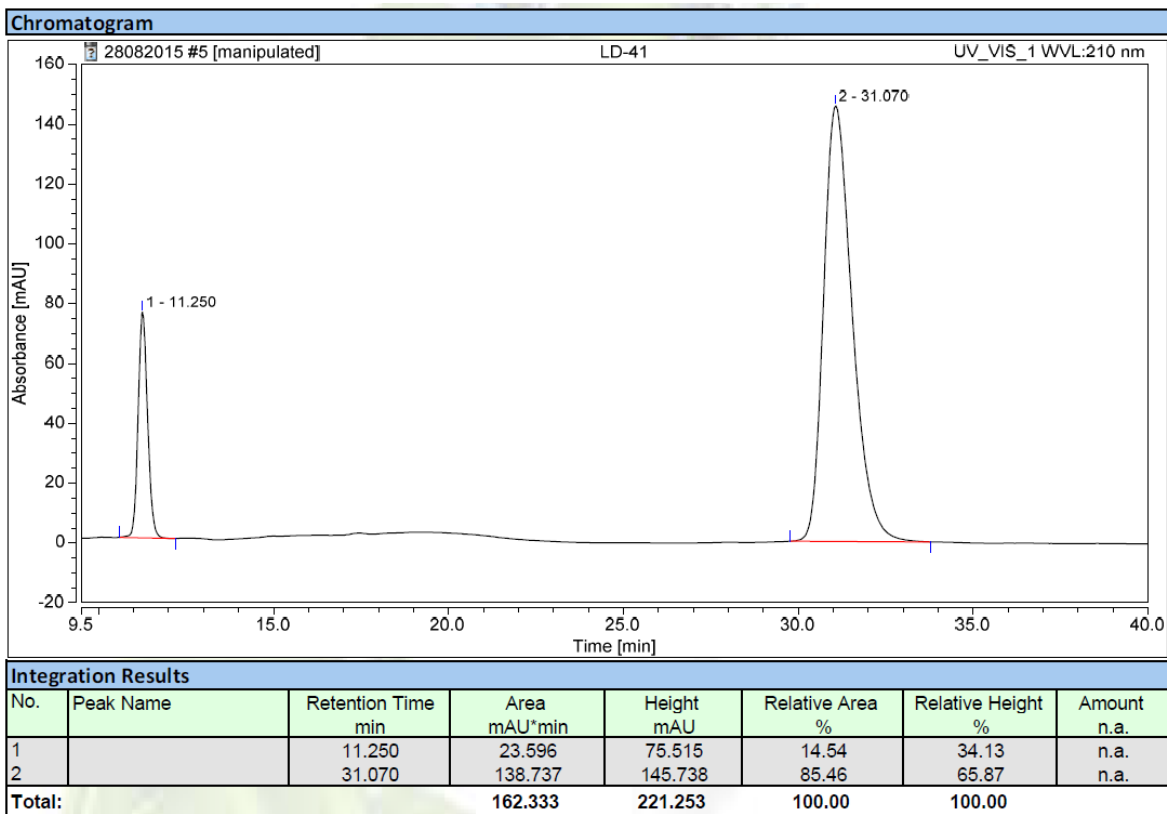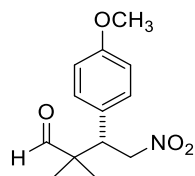

**(S)-3-(4-Methoxyphenyl)-2,2-dimethyl-4-nitrobutanal, 17.**

Optical rotation was in agreement with that previously reported in the literature.<sup>[4]</sup> NMR spectra and HPLC were in agreement with those reported in the literature.<sup>[6]</sup>

<sup>1</sup>H NMR (400 MHz, CDCl<sub>3</sub>) (ppm): 0.99 (s, 3H), 1.12 (s, 3H), 3.74 (dd, *J*<sub>1</sub> = 4.2, *J*<sub>2</sub> = 11.5 Hz, 1H), 3.78 (s, 3H), 4.66 (dd, *J*<sub>1</sub> = 4.3, *J*<sub>2</sub> = 12.9 Hz, 1H), 4.80 (dd, *J*<sub>1</sub> = 11.2, *J*<sub>2</sub> = 12.9 Hz, 1H), 6.85 (d, *J*<sub>AB</sub> = 8.6 Hz, 2H), 7.11 (d, *J*<sub>AB</sub> = 8.8 Hz, 2H), 9.52 (s, 1H).

<sup>13</sup>C NMR (100.52 MHz, CDCl<sub>3</sub>) (ppm): 19.0, 21.7, 47.9, 48.5, 55.3, 76.6, 114.2, 127.2, 130.2, 159.4, 204.6.

$[\alpha]_D^{25^\circ\text{C}} = +2.7$  (*c* = 0.41, CHCl<sub>3</sub>).

HPLC (Chiralcel OD-H, hexane/*i*-PrOH 75/25, 0.8 mL/min,  $\lambda$  = 210 nm): *t*<sub>minor</sub> = 13.7 min., *t*<sub>major</sub> = 19.9 min.

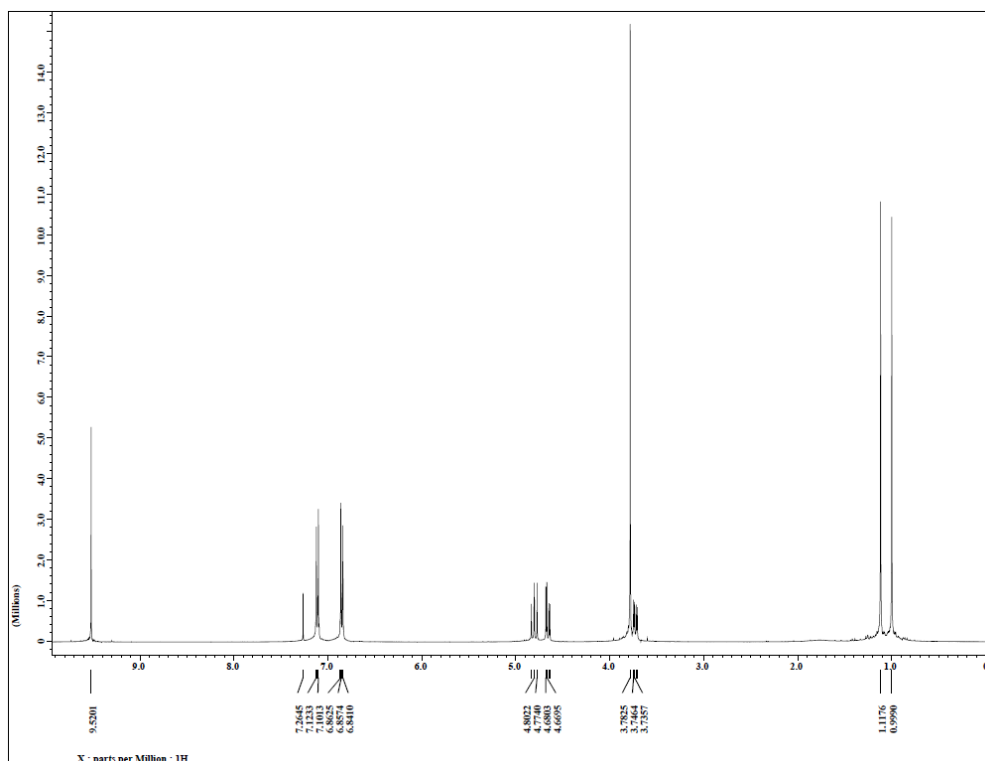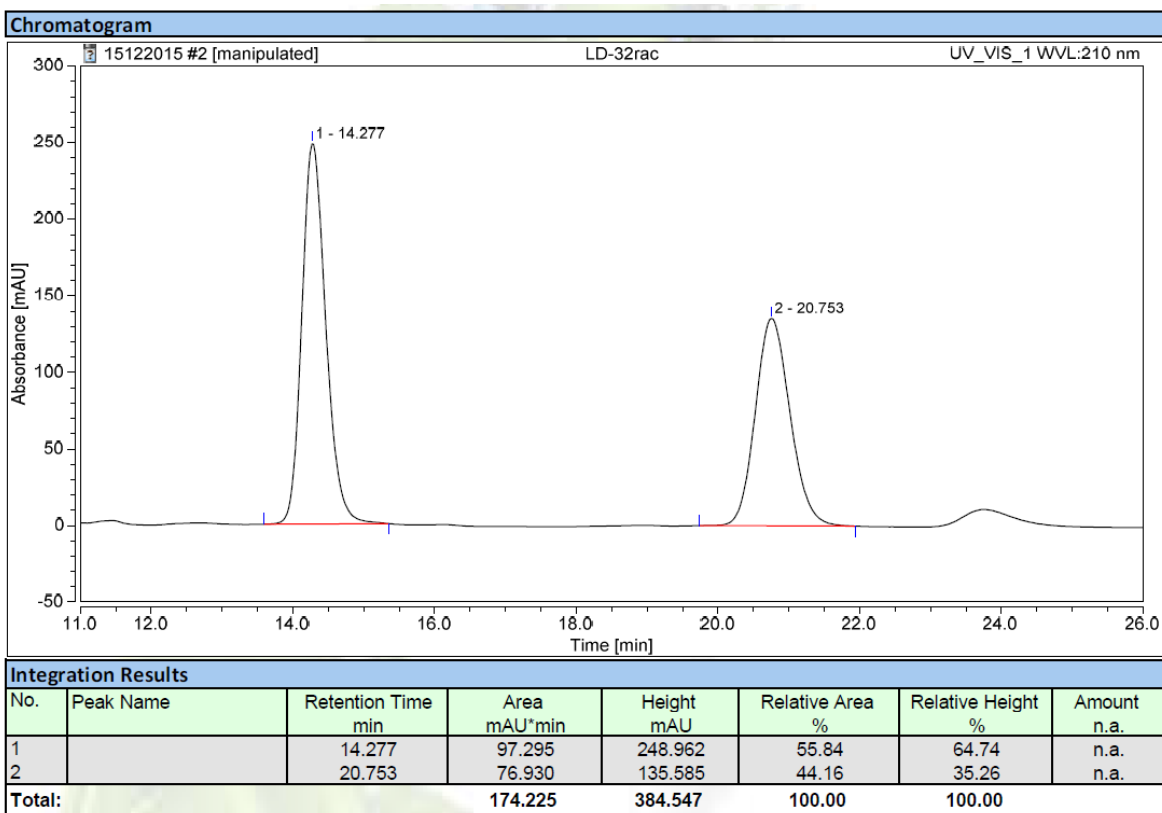

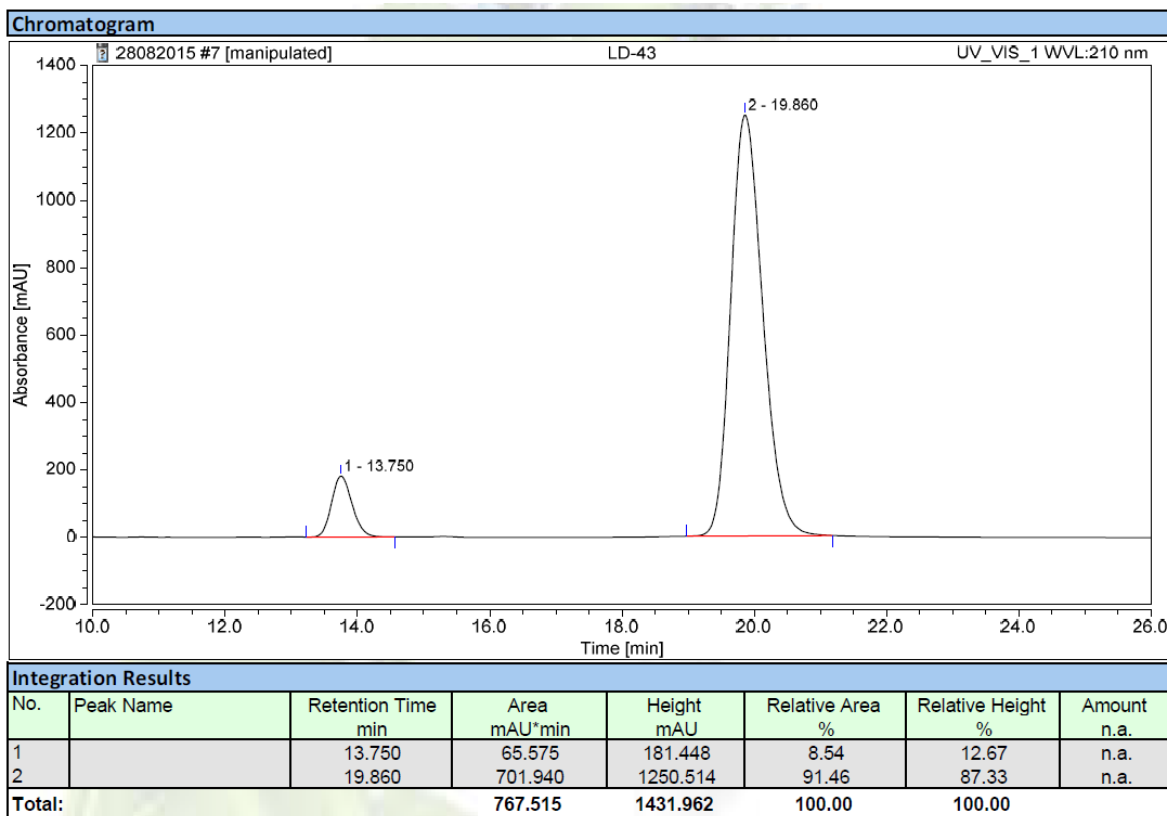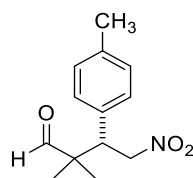

**(S)-2,2-Dimethyl-4-nitro-3-(*p*-tolyl)butanal, 18.**

NMR spectra and HPLC data were in agreement with those reported for the enantiomeric compound in the literature.<sup>[6]</sup>

<sup>1</sup>H NMR (500 MHz, CDCl<sub>3</sub>) (ppm): 0.98 (s, 3H), 1.11 (s, 3H), 2.30 (s, 3H), 3.73 (dd,  $J_1 = 4.2$ ,  $J_2 = 11.3$  Hz, 1H), 4.65 (dd,  $J_1 = 4.2$ ,  $J_2 = 12.7$  Hz, 1H), 4.81 (dd,  $J_1 = 11.3$ ,  $J_2 = 12.7$  Hz, 1H), 7.09 (m, 4H), 9.51 (s, 1H).

<sup>13</sup>C NMR (125.76 MHz, CDCl<sub>3</sub>) (ppm): 18.9, 21.1, 21.6, 48.2, 48.3, 76.5, 129.0, 129.5, 132.2, 138.0, 204.5.

$[\alpha]_D^{25^\circ\text{C}} = -1.2$  ( $c = 0.40$ , CHCl<sub>3</sub>).

HPLC (Chiralcel OD-H, hexane/*i*-PrOH 80/20, 1.0 mL/min,  $\lambda = 210$  nm):  $t_{\text{minor}} = 10.0$  min.,  $t_{\text{major}} = 14.0$  min.



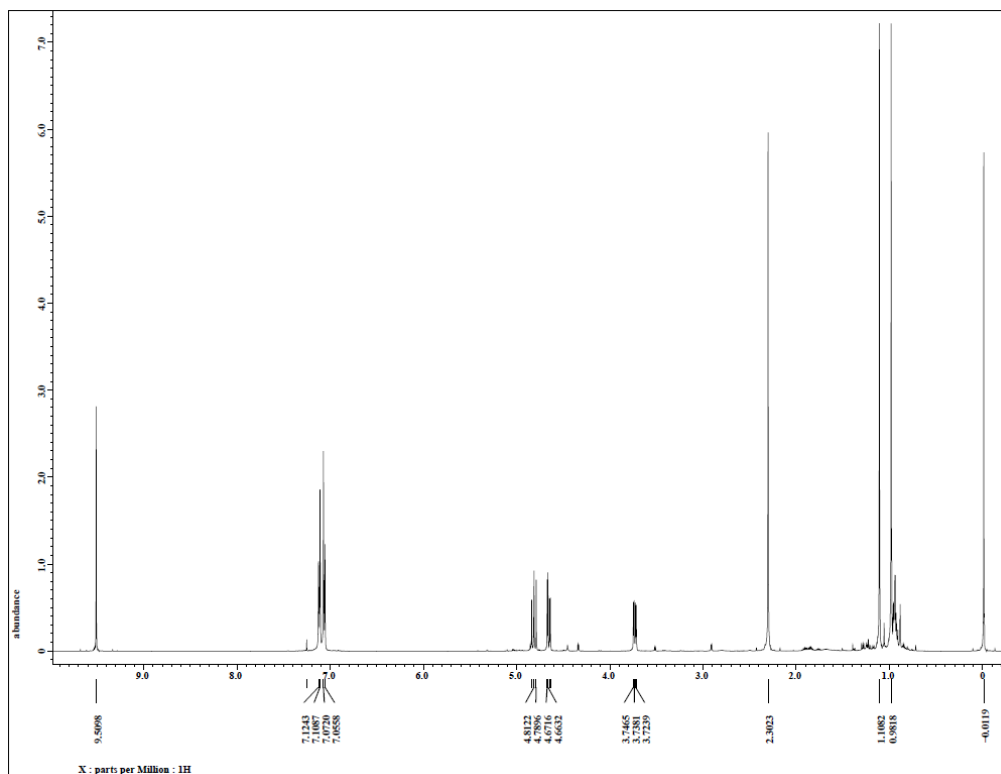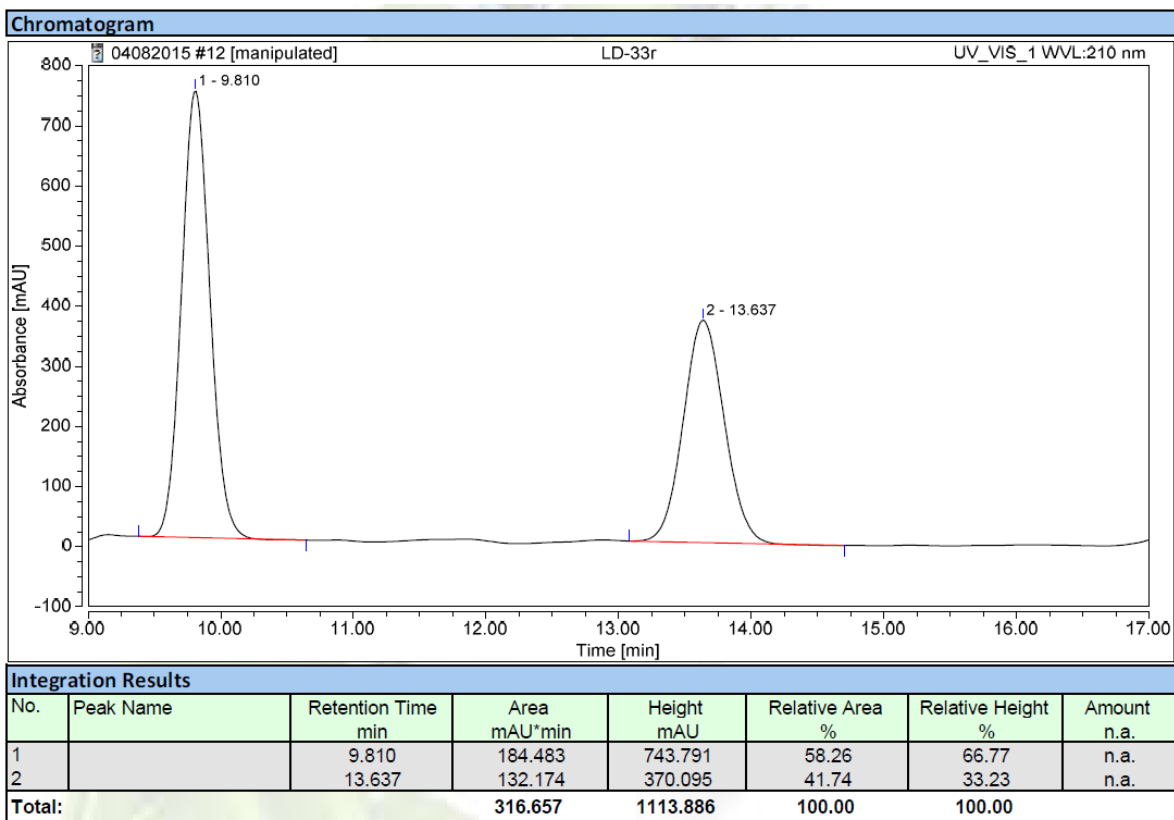

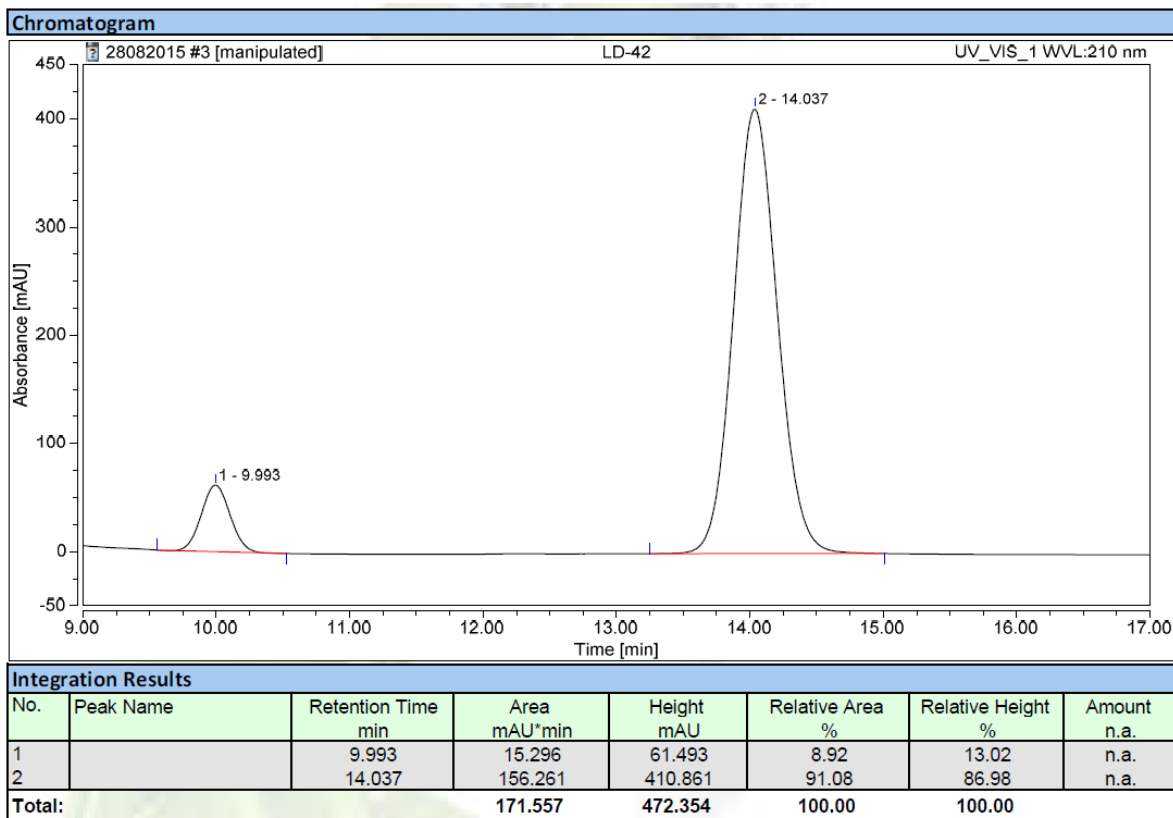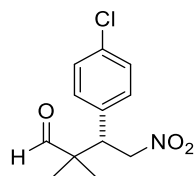

**(S)-3-(4-Chlorophenyl)-2,2-dimethyl-4-nitrobutanal, 19**

NMR spectra and HPLC data in agreement with those reported for the enantiomeric compound in the literature.<sup>[6]</sup>

<sup>1</sup>H NMR (500 MHz, CDCl<sub>3</sub>) (ppm): 1.00 (s, 3H), 1.11 (s, 3H), 3.76 (dd, *J*<sub>1</sub> = 4.2, *J*<sub>2</sub> = 11.3 Hz, 1H), 4.68 (dd, *J*<sub>1</sub> = 4.3, *J*<sub>2</sub> = 13.1 Hz, 1H), 4.81 (dd, *J*<sub>1</sub> = 11.3, *J*<sub>2</sub> = 13.1 Hz, 1H), 7.14 (d, *J*<sub>AB</sub> = 8.5 Hz, 2H), 7.27 (d, *J*<sub>AB</sub> = 8.4 Hz, 2H), 9.49 (s, 1H).

<sup>13</sup>C NMR (125.76 MHz, CDCl<sub>3</sub>) (ppm): 19.0, 21.8, 48.0, 48.3, 76.2, 129.1, 130.5, 134.0, 134.3, 203.9.

[ $\alpha$ ]<sub>D</sub><sup>25°C</sup> = -3.0 (c = 0.333, CHCl<sub>3</sub>).

HPLC (Chiralcel OD-H, hexane/*i*-PrOH 80/20, 0.8 mL/min,  $\lambda$  = 210 nm): *t*<sub>minor</sub> = 14.6 min., *t*<sub>major</sub> = 23.0 min.

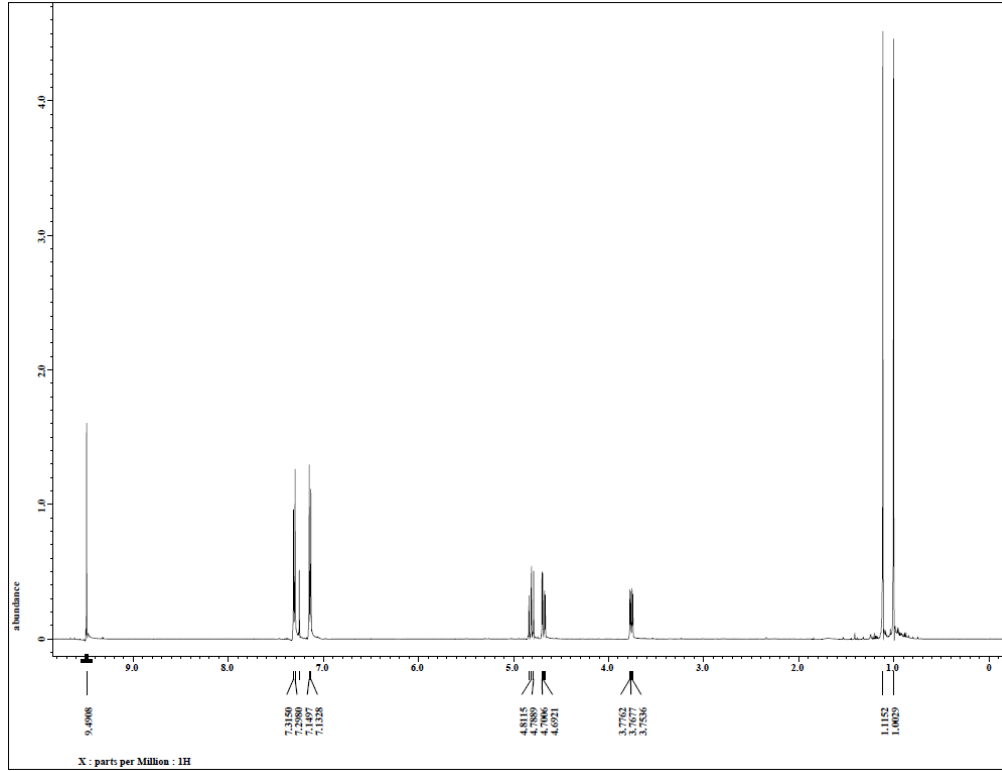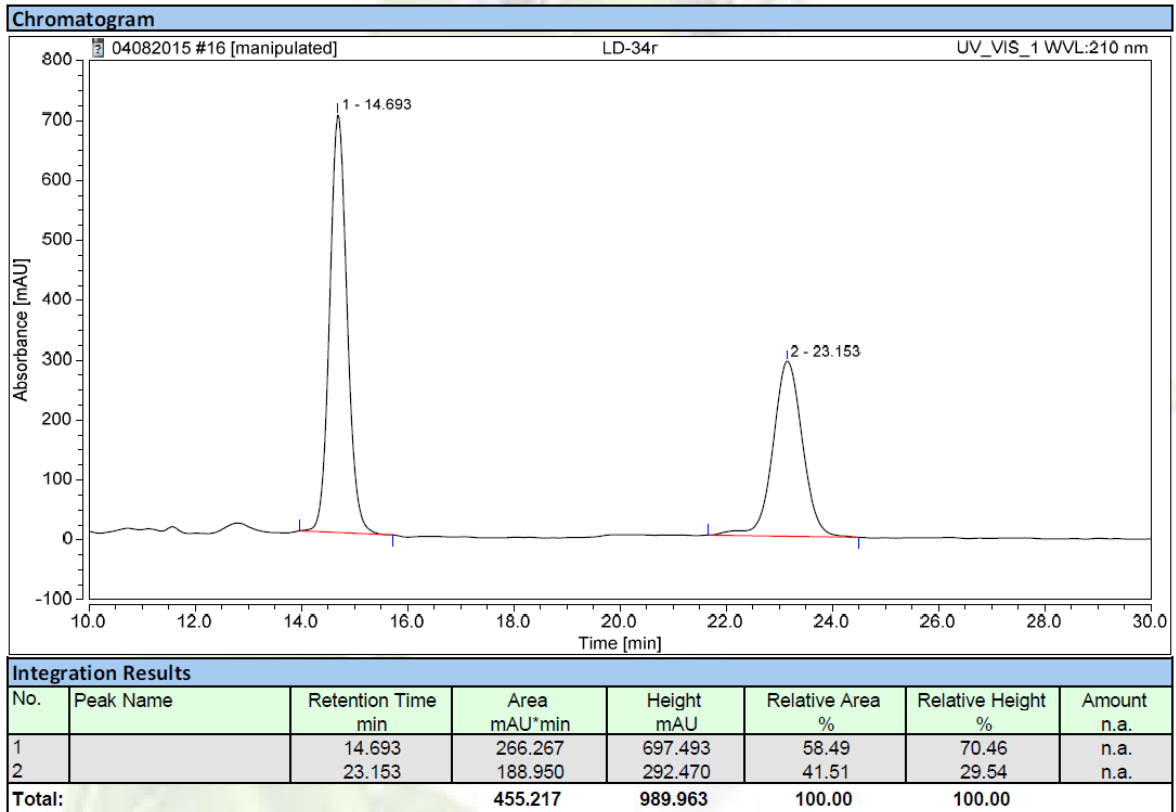

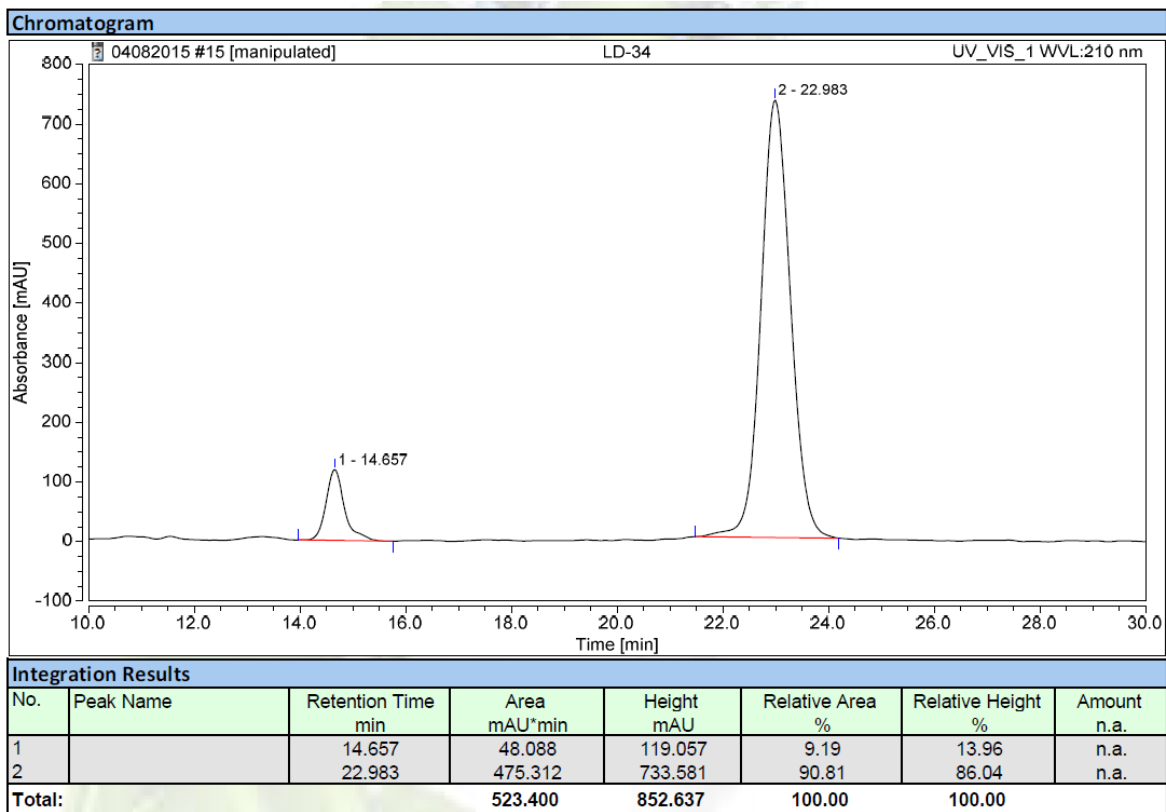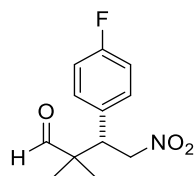

**(S)-3-(4-Fluorophenyl)-2,2-dimethyl-4-nitrobutanal, 20**

NMR spectra and HPLC data were in agreement with those reported in the literature for the enantiomeric compound.<sup>[6]</sup>

<sup>1</sup>H NMR (500 MHz, CDCl<sub>3</sub>) (ppm): 1.00 (s, 3H), 1.16 (s, 3H), 3.77 (dd, *J*<sub>1</sub> = 4.0, *J*<sub>2</sub> = 11.6 Hz, 1H), 4.68 (dd, *J*<sub>1</sub> = 3.9, *J*<sub>2</sub> = 12.9 Hz, 1H), 4.81 (dd, *J*<sub>1</sub> = 11.6, *J*<sub>2</sub> = 12.9 Hz, 1H), 7.00-7.19 (m, Hz, 4H), 9.5 (s, 1H).

<sup>13</sup>C NMR (125.76 MHz, CDCl<sub>3</sub>) (ppm): 19.0, 21.8, 47.9, 48.3, 76.9, 115.8 (d, *J*<sub>C-F</sub> = 21.1 Hz), 130.8 (d, *J*<sub>C-F</sub> = 8.6 Hz), 131.2, 162.5 (d, *J*<sub>C-F</sub> = 247.6 Hz), 203.9.

[α]<sub>D</sub><sup>25°C</sup> = +8.0 (c = 0.29, CHCl<sub>3</sub>).

HPLC (Chiralcel OD-H, hexane/*i*-PrOH 80/20, 1.0 mL/min, λ = 210 nm): *t*<sub>minor</sub> = 10.1 min., *t*<sub>major</sub> = 17.2 min.

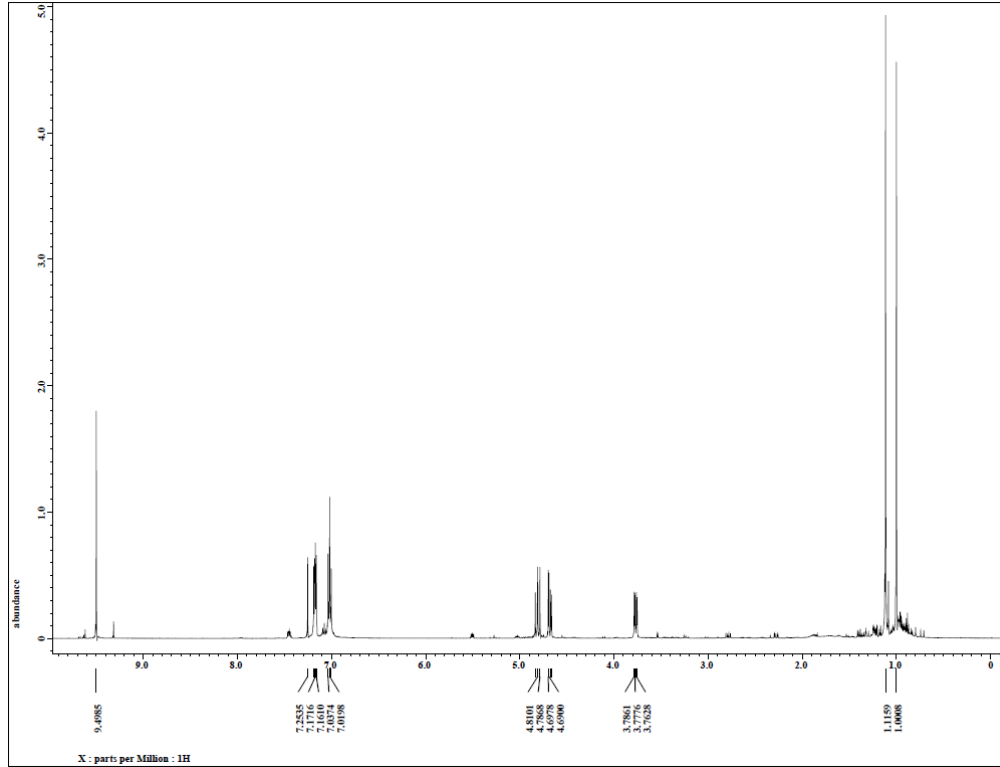

**Chromatogram**

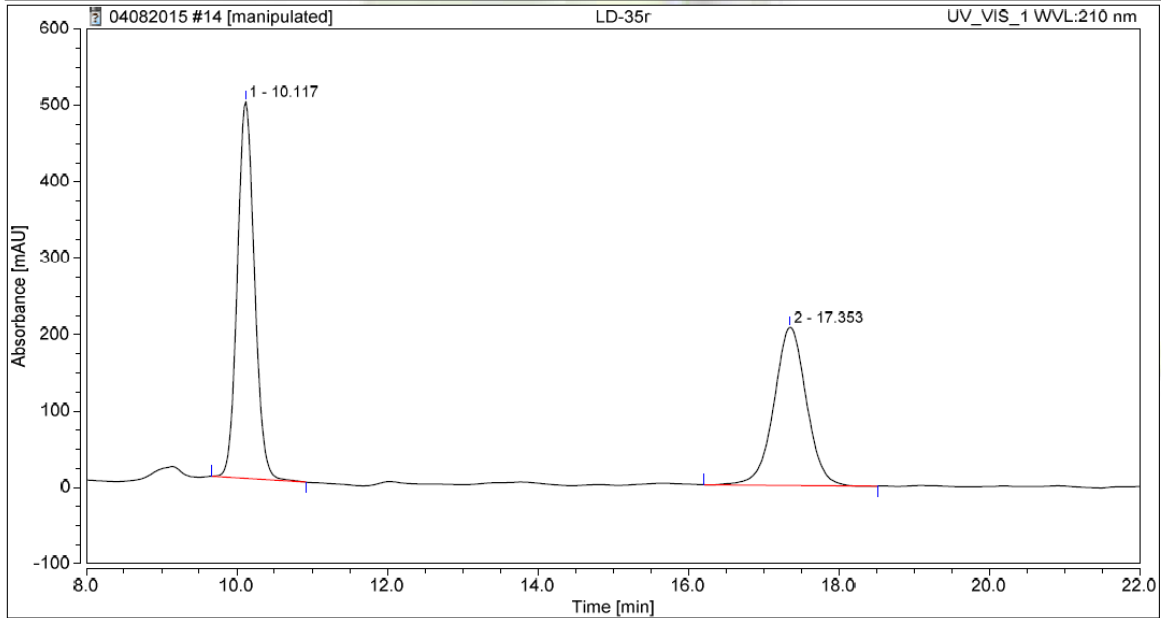

**Integration Results**

| No.           | Peak Name | Retention Time<br>min | Area<br>mAU*min | Height<br>mAU  | Relative Area<br>% | Relative Height<br>% | Amount<br>n.a. |
|---------------|-----------|-----------------------|-----------------|----------------|--------------------|----------------------|----------------|
| 1             |           | 10.117                | 129.942         | 493.828        | 55.76              | 70.45                | n.a.           |
| 2             |           | 17.353                | 103.116         | 207.168        | 44.24              | 29.55                | n.a.           |
| <b>Total:</b> |           |                       | <b>233.057</b>  | <b>700.995</b> | <b>100.00</b>      | <b>100.00</b>        |                |

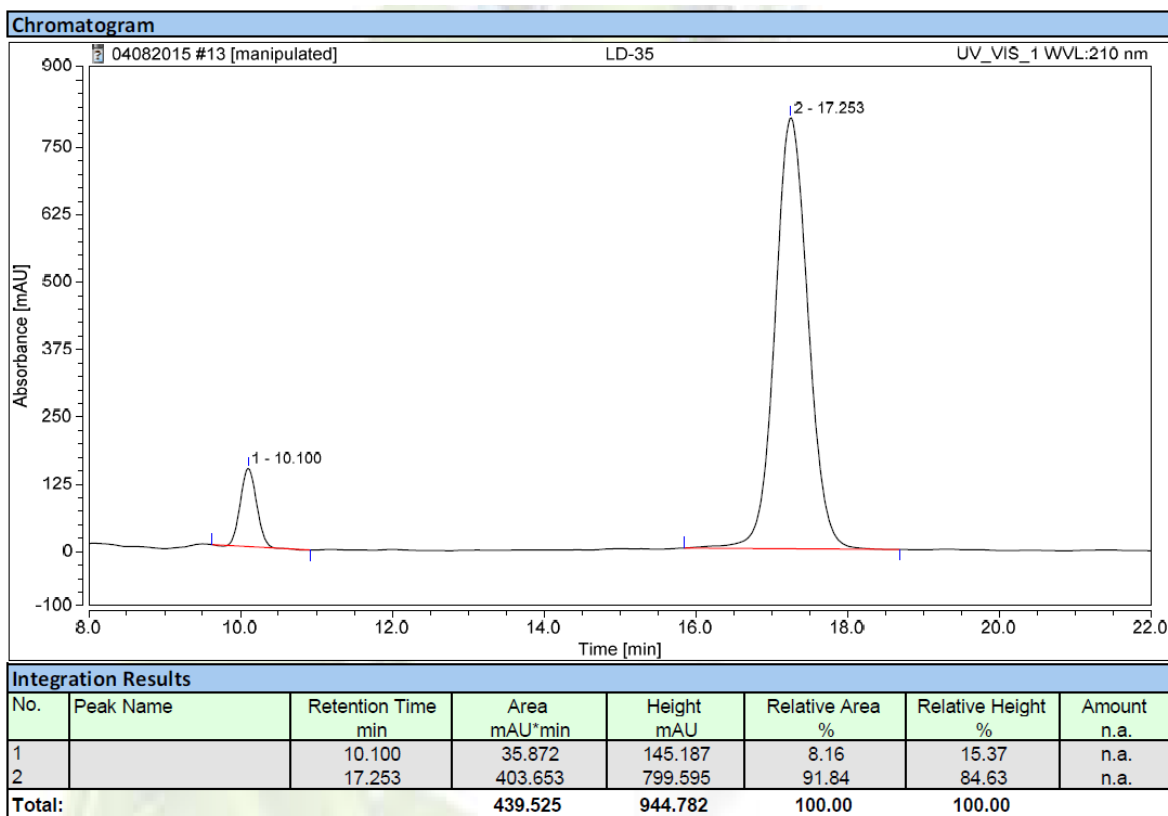

#### 4. Bibliography

1. Kokotos, C.G. An asymmetric Michael addition of  $\alpha,\alpha$ -disubstituted aldehydes to maleimides leading to a one-pot enantioselective synthesis of lactones catalyzed by amino acids. *Org. Lett.* **2013**, *15*, 2406–2409.
2. Yu, F.; Jin, Z.; Huang, H.; Ye, T.; Liang, X.; Ye, J. A highly efficient asymmetric Michael addition of  $\alpha,\alpha$ -disubstituted aldehydes to maleimides catalyzed by primary amine thiourea salt. *Org. Biomol. Chem.* **2010**, *8*, 4767–4774.
3. Avila, A.; Chinchilla, R.; Gómez-Bengoa, E.; Nájera, C. Enantioselective synthesis of succinimides by Michael Addition of aldehydes to maleimides organocatalyzed by chiral primary amine-guanidines. *Eur. J. Org. Chem.* **2013**, *2013*, 5085-5092.
4. Yoshida, M.; Sato, A.; Hara, S. Asymmetric Michael addition of aldehydes to nitroalkenes using a primary amino acid lithium salt. *Org. Biomol. Chem.* **2010**, *8*, 3031-3036.
5. Luo, C.; Du, D.-M. Highly enantioselective Michael addition of ketones and an aldehyde to nitroalkenes catalyzed by a binaphthyl sulfonimide in water. *Synthesis* **2011**, 1968-1973.
6. Nugent, T.C.; Shoaib, M.; Shoaib, A. Practical access to highly enantioenriched quaternary carbon Michael adducts using simple organocatalysts. *Org. Biomol. Chem.* **2011**, *9*, 52–56.
